# Supplementary material for: Using a modified DNDC biogeochemical model to optimize field management of a multi-crop (cotton, wheat, and maize) system: a site-scale case study in northern China
Source: Copernicus journal article supplement (doi:10.5194/bg-16-2905-2019), 2019-07-31
Supplement: Supplementary file 1 [file bg-16-2905-2019-supplement.zip]

Archive with 3 entries (3 files):
- bg-16-2905-2019-supplement-title-page.pdf
- Supplementary materials.pdf
- Data for Fig. 1.xlsx
