# Supplementary material for: Using a modified DNDC biogeochemical model to optimize field management of a multi-crop (cotton, wheat, and maize) system: a site-scale case study in northern China
Source: Copernicus journal article supplement (doi:10.5194/bg-16-2905-2019), 2019-07-31
Supplement: Supplementary file 1 [file bg-16-2905-2019-supplement.zip › bg-16-2905-2019-supplement-title-page.pdf]

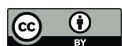

## *Supplement of*

# **Using a modified DNDC biogeochemical model to optimize field management of a multi-crop (cotton, wheat, and maize) system: a site-scale case study in northern China**

**Wei Zhang et al.**

*Correspondence to:* Xunhua Zheng ([xunhua.zheng@post.iap.ac.cn](mailto:xunhua.zheng@post.iap.ac.cn))

- [bg-16-2905-2019-supplement-title-page.pdf](#)
- [Data for Fig. 1.xlsx](#)
- [Supplementary materials.pdf](#)

The copyright of individual parts of the supplement might differ from the CC BY 4.0 License.
