# Supplementary material for: Using a modified DNDC biogeochemical model to optimize field management of a multi-crop (cotton, wheat, and maize) system: a site-scale case study in northern China
Source: Copernicus journal article supplement (doi:10.5194/bg-16-2905-2019), 2019-07-31
Supplement: Supplementary file 1 [file bg-16-2905-2019-supplement.zip › Data for Fig. 1.xlsx]

## Sheet: Model output for Fig. 1
Date	Soil temperature	Soil moisture	NO	N2O		Date	CH4		Date	NEE (cotton)	Date	NEE (wheat)	Date	NEE (maize)
	oC	WFPS(%)	ug N m-2 h-1				ug C m-2 h-1			g C m-2 d-1		g C m-2 d-1		g C m-2 d-1
2007-11-11	12.3	24	3.68125	2.74167		2010-03-01	-10.9583		2008-11-08	3.372	2009-04-04	-8.45842	2009-06-06	4.505
2007-11-12	11.3	22.5	3.4875	2.89583		2010-03-02	-11.3333		2008-11-09	2.943	2009-04-05	-8.53299	2009-06-07	4.682
2007-11-13	10.4	21.5	3.50625	3.00833		2010-03-03	-8.95833		2008-11-10	2.717	2009-04-06	-8.5294	2009-06-08	4.742
2007-11-14	10.1	20.5	3.49375	3.075		2010-03-04	-9.125		2008-11-11	2.473	2009-04-07	-7.44278	2009-06-09	4.716
2007-11-15	9.8	24.5	3.525	3.17083		2010-03-05	-7.25		2008-11-12	2.296	2009-04-08	-5.59638	2009-06-10	4.697
2007-11-16	9.5	23.5	12.0875	3.25417		2010-03-06	-5.95833		2008-11-13	2.203	2009-04-09	-5.70159	2009-06-11	4.682
2007-11-17	9.4	22.5	22.1062	3.29167		2010-03-07	-5.33333		2008-11-14	2.414	2009-04-10	-4.28233	2009-06-12	4.65299
2007-11-18	8.9	21.5	26.7875	3.29583		2010-03-08	-4.125		2008-11-15	2.194	2009-04-11	-6.76901	2009-06-13	4.64099
2007-11-19	8.7	21	29.6812	3.27917		2010-03-09	-1.66667		2008-11-16	2.011	2009-04-12	-5.73415	2009-06-14	4.63399
2007-11-20	8.6	20	31.375	3.1875		2010-03-10	-2		2008-11-17	1.892	2009-04-13	-4.61109	2009-06-15	4.57498
2007-11-21	8.3	19.5	31.8813	3.0875		2010-03-11	-6.83333		2008-11-18	1.67	2009-04-14	-4.06867	2009-06-16	4.54098
2007-11-22	8.6	19	31.9438	2.99167		2010-03-12	-13.5833		2008-11-19	1.438	2009-04-15	-4.67389	2009-06-17	4.59798
2007-11-23	8.6	18	31.5312	2.89583		2010-03-13	-15.7917		2008-11-20	1.276	2009-04-16	-7.0467	2009-06-18	4.52898
2007-11-24	9.6	17.5	30.375	2.80833		2010-03-14	-11.7083		2008-11-21	1.162	2009-04-17	-5.76882	2009-06-19	4.42898
2007-11-25	9.8	17	30.5938	2.73333		2010-03-15	-9.70833		2008-11-22	1.155	2009-04-18	-4.37429	2009-06-20	4.43692
2007-11-26	8	16.5	30.7375	2.64167		2010-03-16	-11.0833		2008-11-23	1.168	2009-04-19	-3.42301	2009-06-21	4.43592
2007-11-27	7	15.5	29.65	2.5375		2010-03-17	-15.3333		2008-11-24	1.125	2009-04-20	-6.16154	2009-06-22	4.41385
2007-11-28	6.4	15.5	28.4625	2.42917		2010-03-18	-17.8333		2008-11-25	1.048	2009-04-21	-7.85718	2009-06-23	4.37584
2007-11-29	6.1	15	26.375	2.325		2010-03-19	-20.4583		2008-11-26	0.951	2009-04-22	-5.31641	2009-06-24	4.35577
2007-11-30	6.2	14.5	23.7063	2.225		2010-03-20	-19.2917		2008-11-27	0.84	2009-04-23	-6.2466	2009-06-25	4.32871
2007-12-01	5.5	41.5	21.6812	2.16667		2010-03-21	-19		2008-11-28	0.757	2009-04-24	-6.14064	2009-06-26	4.3247
2007-12-02	4.7	39.5	19.9875	2.15833		2010-03-22	-19.2083		2008-11-29	0.73	2009-04-25	-12.0925	2009-06-27	2.03677
2007-12-03	4.1	37.5	18.5312	2.09583		2010-03-23	-18.4167		2008-11-30	0.701	2009-04-26	-11.1816	2009-06-28	1.90289
2007-12-04	4.9	35.5	17.3188	2.0125		2010-03-24	-17.4583		2008-12-01	0.704	2009-04-27	-13.1726	2009-06-29	1.66708
2007-12-05	5	34	16.4	1.92083		2010-03-25	-14.875		2008-12-02	0.694	2009-04-28	-6.73882	2009-06-30	1.50776
2007-12-06	4.7	32.5	15.5687	1.825		2010-03-26	-13.25		2008-12-03	0.702	2009-04-29	-4.58345	2009-07-01	1.37438
2007-12-07	4.1	31.5	14.6	1.725		2010-03-27	-16.875		2008-12-04	0.599	2009-04-30	-2.25572	2009-07-02	1.26688
2007-12-08	3.6	29.5	13.6062	1.62917		2010-03-28	-19.25		2008-12-05	0.49	2009-05-01	-1.29819	2009-07-03	1.14878
2007-12-09	3.8	28.5	12.6438	1.53333		2010-03-29	-20.3333		2008-12-06	0.421	2009-05-02	-14.7285	2009-07-04	0.99091
2007-12-10	4.6	27.5	11.7562	1.44583		2010-03-30	-21		2008-12-07	0.403	2009-05-03	-1.31323	2009-07-05	-0.03254
2007-12-11	4.7	26.5	13.9688	1.36667		2010-03-31	-22.5417		2008-12-08	0.483	2009-05-04	-9.78379	2009-07-06	-1.13345
2007-12-12	4	25.5	17.3687	1.2875		2010-04-01	-15.5833		2008-12-09	0.53	2009-05-05	-9.89475	2009-07-07	-2.14254
2007-12-13	2.3	24	18.1313	1.20833		2010-04-02	-12.375		2008-12-10	0.56	2009-05-06	-5.50975	2009-07-08	-2.11434
2007-12-14	2	23	17.5813	1.13333		2010-04-03	-16.3333		2008-12-11	0.536	2009-05-07	-4.6891	2009-07-09	-3.96074
2007-12-15	2.7	22	16.4812	1.06667		2010-04-04	-15.875		2008-12-12	0.518	2009-05-08	-7.4724	2009-07-10	-4.05386
2007-12-16	3	21	15.1937	1.00417		2010-04-05	-19.6667		2008-12-13	0.496	2009-05-09	-6.27282	2009-07-11	-5.20816
2007-12-17	3.3	20.5	13.8562	0.94167		2010-04-06	-15.6667		2008-12-14	0.454	2009-05-10	-6.56882	2009-07-12	-6.15362
2007-12-18	3.1	19.5	12.525	0.8875		2010-04-07	-16.7083		2008-12-15	0.418	2009-05-11	-0.78863	2009-07-13	-5.91646
2007-12-19	3.2	18.5	11.2562	0.8375		2010-04-08	-19.2917		2008-12-16	0.38	2009-05-12	-7.12208	2009-07-14	-7.7995
2007-12-20	3	18.5	10.1188	0.7875		2010-04-09	-21.375		2008-12-17	0.359	2009-05-13	-0.4729	2009-07-15	-7.18918
2007-12-21	3	17.5	9.13125	0.74167		2010-04-10	-21.0833		2008-12-18	0.333	2009-05-14	1.27743	2009-07-16	-8.84542
2007-12-22	2.8	17	8.26875	0.7		2010-04-11	-8.29167		2008-12-19	0.284	2009-05-15	-3.03012	2009-07-17	-6.75688
2007-12-23	2.9	16	7.48125	0.65833		2010-04-12	-8.08333		2008-12-20	0.277	2009-05-16	-3.78738	2009-07-18	-10.9185
2007-12-24	3.4	17.5	6.73125	0.625		2010-04-13	-6.125		2008-12-21	0.23	2009-05-17	-6.08832	2009-07-19	-6.53378
2007-12-25	4.2	16.5	6.05	0.59167		2010-04-14	-5.375		2008-12-22	0.585	2009-05-18	-5.79683	2009-07-20	-6.01057
2007-12-26	4.7	16.5	5.4625	0.5625		2010-04-15	-8.29167		2008-12-23	0.501	2009-05-19	-4.46154	2009-07-21	-7.11932
2007-12-27	4.9	16	4.9625	0.53333		2010-04-16	-13.4167		2008-12-24	0.453	2009-05-20	-0.57287	2009-07-22	-8.05502
2007-12-28	3.8	15.5	4.5375	0.50833		2010-04-17	-18		2008-12-25	0.423	2009-05-21	1.60885	2009-07-23	-9.92647
2007-12-29	2.8	15	4.18125	0.48333		2010-04-18	-23.6667		2008-12-26	0.423	2009-05-22	-2.87466	2009-07-24	-9.81233
2007-12-30	1.4	14.5	3.875	0.45833		2010-04-19	-27.75		2008-12-27	0.414	2009-05-23	-1.65023	2009-07-25	-10.0903
2007-12-31	0.6	14.5	3.6125	0.42917		2010-04-20	-13.9583		2008-12-28	0.426	2009-05-24	-1.72948	2009-07-26	-11.1102
2008-01-01	1.3	14.5	3.38125	0.39583		2010-04-21	-12		2008-12-29	0.405	2009-05-25	-2.44382	2009-07-27	-8.0915
2008-01-02	0.6	14.5	3.175	0.36667		2010-04-22	-14.3333		2008-12-30	0.381	2009-05-26	-2.06789	2009-07-28	-12.6054
2008-01-03	1.2	14	3.0625	0.34167		2010-04-23	-16.9583		2008-12-31	0.222	2009-05-27	2.67365	2009-07-29	-11.8047
2008-01-04	1.3	13.5	3.00625	0.31667		2010-04-24	-21.6667		2009-01-01	0.219	2009-05-28	1.47851	2009-07-30	-10.6361
2008-01-05	1.6	13.5	2.95625	0.29583		2010-04-25	-12.9167		2009-01-02	0.07	2009-05-29	0.43772	2009-07-31	-11.8446
2008-01-06	1.7	13.5	2.91875	0.275		2010-04-26	-15.1667		2009-01-03	0.069	2009-05-30	1.24191	2009-08-01	-11.6756
2008-01-07	2.1	13	2.88125	0.25833		2010-04-27	-18.5		2009-01-04	0.067	2009-05-31	1.68256	2009-08-02	-12.8064
2008-01-08	2.9	13	2.81875	0.24167		2010-04-28	-13.9167		2009-01-05	0.65	2009-06-01	1.52464	2009-08-03	-4.31034
2008-01-09	2.8	12.5	2.71875	0.225		2010-04-29	-17.0833		2009-01-06	0.64	2009-06-02	1.88172	2009-08-04	-9.81152
2008-01-10	2.6	12	2.325	0.20833		2010-04-30	-15		2009-01-07	0.62	2009-06-03	2.18623	2009-08-05	-13.6183
2008-01-11	1.5	12	1.8	0.19583		2010-05-01	-20.1667		2009-01-08	0.61	2009-06-04	1.87562	2009-08-06	-13.7621
2008-01-12	1.2	12	1.39375	0.17917		2010-05-02	-26.3333		2009-01-09	0.58	2009-06-05	0.49925	2009-08-07	-13.645
2008-01-13	0.9	12	1.08125	0.16667		2010-05-03	-32.2917		2009-01-10	0.55			2009-08-08	-13.1014
2008-01-14	0.8	11.5	0.85	0.15833		2010-05-04	-30.2917		2009-01-11	0.52	2009-10-15	2.345	2009-08-09	-12.3244
2008-01-15	0.7	11.5	0.675	0.14583		2010-05-05	-30.625		2009-01-12	0.5	2009-10-16	2.38	2009-08-10	-10.4648
2008-01-16	0.6	11.5	0.5375	0.1375		2010-05-06	-31.875		2009-01-13	0.47	2009-10-17	2.258	2009-08-11	-13.6616
2008-01-17	0.5	11.5	0.43125	0.125		2010-05-07	-26.2917		2009-01-14	0.44	2009-10-18	2.318	2009-08-12	-15.0962
2008-01-18	0.4	11.5	0.35625	0.11667		2010-05-08	-29.5833		2009-01-15	0.42	2009-10-19	2.144	2009-08-13	-13.3939
2008-01-19	0.1	11.5	0.29375	0.10833		2010-05-09	-29.4167		2009-01-16	0.41	2009-10-20	2.214	2009-08-14	-12.9339
2008-01-20	-0.5	11.5	0.24375	0.1		2010-05-10	-31.125		2009-01-17	0.4	2009-10-21	1.76667	2009-08-15	-11.0219
2008-01-21	-0.9	11.5	0.20625	0.09583		2010-05-11	-34.0833		2009-01-18	0.39	2009-10-22	1.73	2009-08-16	-2.4402
2008-01-22	-1.2	11.5	0.18125	0.0875		2010-05-12	-28.2917		2009-01-19	0.4	2009-10-23	1.69933	2009-08-17	-10.434
2008-01-23	-2	11.5	0.15625	0.08333		2010-05-13	-27.7083		2009-01-20	0.47	2009-10-24	1.68267	2009-08-18	-11.2373
2008-01-24	-2.5	11.5	0.1375	0.075		2010-05-14	-28.875		2009-01-21	0.45	2009-10-25	1.65833	2009-08-19	-9.89381
2008-01-25	-2.8	11.5	0.125	0.08333		2010-05-15	-31.2083		2009-01-22	0.43	2009-10-26	1.63167	2009-08-20	0.8919
2008-01-26	-2.5	11.5	0.1	0.075		2010-05-16	-16.8333		2009-01-23	0.39	2009-10-27	1.59467	2009-08-21	0.76305
2008-01-27	-2.5	11.5	0.08125	0.06667		2010-05-17	-17.2917		2009-01-24	0.36	2009-10-28	1.57933	2009-08-22	-11.1351
2008-01-28	-2.4	11.5	0.0625	0.0625		2010-05-18	-20.8333		2009-01-25	0.33	2009-10-29	1.57033	2009-08-23	-14.0933
2008-01-29	-3.2	11.5	0.05	0.0625		2010-05-19	-24.8333		2009-01-26	0.32	2009-10-30	1.729	2009-08-24	-14.8284
2008-01-30	-3.4	11.5	0.0375	0.0625		2010-05-20	-28.8333		2009-01-27	0.32	2009-10-31	1.80967	2009-08-25	-15.2459
2008-01-31	-3.8	11.5	0.025	0.05417		2010-05-21	-26.7917		2009-01-28	0.32	2009-11-01	1.81	2009-08-26	-11.6818
2008-02-01	-3.1	11.5	0.01875	0.05417		2010-05-22	-31.2083		2009-01-29	0.31	2009-11-02	1.70666	2009-08-27	-14.2658
2008-02-02	-2.9	11.5	0.01875	0.05		2010-05-23	-35.625		2009-01-30	0.38	2009-11-03	1.62233	2009-08-28	-8.52482
2008-02-03	-2.5	11.5	0.0125	0.04583		2010-05-24	-40.625		2009-01-31	0.47	2009-11-04	1.60333	2009-08-29	-1.70757
2008-02-04	-2.3	11.5	0.0125	0.04167		2010-05-25	-44.0833		2009-02-01	0.57	2009-11-05	1.569	2009-08-30	-12.2468
2008-02-05	-2.1	11.5	0.00625	0.03333		2010-05-26	-26.4583		2009-02-02	0.61	2009-11-06	1.559	2009-08-31	-12.9267
2008-02-06	-2.3	11.5	0.00625	0.03333		2010-05-27	-18.125		2009-02-03	0.63	2009-11-07	1.57466	2009-09-01	-12.2656
2008-02-07	-2.3	11.5	0.00625	0.02917		2010-05-28	-18.25		2009-02-04	0.65	2009-11-08	1.56133	2009-09-02	-9.52745
2008-02-08	-2.4	11.5	0.00625	0.025		2010-05-29	-23.7917		2009-02-05	0.71	2009-11-09	1.54733	2009-09-03	-9.79212
2008-02-09	-2.8	11.5	0	0.02083		2010-05-30	-29.625		2009-02-06	0.92	2009-11-10	1.48233	2009-09-04	-7.15779
2008-02-10	-1.9	11.5	0	0.02083		2010-05-31	-27.1667		2009-02-07	1.15	2009-11-11	1.347	2009-09-05	-7.0286
2008-02-11	-1.1	11.5	0	0.01667		2010-06-01	-19.9583		2009-02-08	1.3	2009-11-12	1.36567	2009-09-06	-6.10615
2008-02-12	-0.8	11.5	0	0.01667		2010-06-02	-25.0417		2009-02-09	1.45	2009-11-13	1.21	2009-09-07	-0.19947
2008-02-13	-0.8	11.5	0	0.01667		2010-06-03	-20.625		2009-02-10	1.52	2009-11-14	1.128	2009-09-08	3.37145
2008-02-14	-0.1	11.5	0	0.0125		2010-06-04	-25.4167		2009-02-11	1.5	2009-11-15	1.06467	2009-09-09	-5.10401
2008-02-15	0	11.5	0	0.0125		2010-06-05	-29.9583		2009-02-12	1.73	2009-11-16	1.02233	2009-09-10	-0.18836
2008-02-16	0.7	11.5	0	0.0125		2010-06-06	-34.375		2009-02-13	1.89	2009-11-17	0.5824	2009-09-11	0.07812
2008-02-17	0.8	11.5	0	0.00833		2010-06-07	-19.9583		2009-02-14	1.74	2009-11-18	0.538	2009-09-12	0.61789
2008-02-18	1.5	11.5	0	0.00833		2010-06-08	-18.125		2009-02-15	1.61	2009-11-19	0.4992	2009-09-13	2.39766
2008-02-19	1.9	11.5	0	0.00833		2010-06-09	-21.25		2009-02-16	1.38	2009-11-20	0.497	2009-09-14	-2.76194
2008-02-20	2.3	11.5	0	0.00833		2010-06-10	-25.2083		2009-02-17	1.13	2009-11-21	0.5018	2009-09-15	-3.8268
2008-02-21	2.9	11.5	0	0.00833		2010-06-11	-30.3333		2009-02-18	1.29	2009-11-22	0.5054	2009-09-16	-2.45941
2008-02-22	4	11.5	0	0.00833		2010-06-12	-35.125		2009-02-19	1.22	2009-11-23	0.5008	2009-09-17	-3.30956
2008-02-23	4.2	11.5	0	0.00833		2010-06-13	-39.0417		2009-02-20	1.27	2009-11-24	0.5152	2009-09-18	-4.41704
2008-02-24	3	11	0	0.00833		2010-06-14	-43.3333		2009-02-21	1.35	2009-11-25	0.5246	2009-09-19	3.28434
2008-02-25	2.8	11	0	0.00833		2010-06-15	-47.25		2009-02-22	1.4	2009-11-26	0.5274	2009-09-20	-2.92526
2008-02-26	2.8	11	0.00625	0.00833		2010-06-16	-51.25		2009-02-23	1.43	2009-11-27	0.5168	2009-09-21	-2.65619
2008-02-27	3.1	11	0.0125	0.00417		2010-06-17	-52.1667		2009-02-24	1.23	2009-11-28	0.5254	2009-09-22	-2.55563
2008-02-28	4.2	11	0.0125	0.00417		2010-06-18	-53.5417		2009-02-25	1.12	2009-11-29	0.5094	2009-09-23	-1.42432
2008-02-29	5.5	11	0.01875	0.00417		2010-06-19	-55.5		2009-02-26	1.13	2009-11-30	0.4952	2009-09-24	0.72069
2008-03-01	7.4	11	0.025	0.05417		2010-06-20	-55.3333		2009-02-27	1.21	2009-12-01	0.4804	2009-09-25	-0.6647
2008-03-02	7.1	66.5	0.03125	0.2125		2010-06-21	-56.4167		2009-02-28	1.29	2009-12-02	0.493	2009-09-26	0.69646
2008-03-03	6.5	57.5	0.0375	0.45833		2010-06-22	-58.2083		2009-03-01	1.18	2009-12-03	0.46	2009-09-27	1.26015
2008-03-04	6.6	50.5	0.0375	0.52083		2010-06-23	-58.2083		2009-03-02	1.09	2009-12-04	0.4326	2009-09-28	1.99035
2008-03-05	7.2	45	0.04375	0.54167		2010-06-24	-57.75		2009-03-03	1.11	2009-12-05	0.4084	2009-09-29	2.13385
2008-03-06	8.2	41.5	0.04375	0.55		2010-06-25	-57.2917		2009-03-04	1.14	2009-12-06	0.3882	2009-09-30	3.35265
2008-03-07	8.4	38	0.04375	0.525		2010-06-26	-56.5417		2009-03-05	1.14	2009-12-07	0.3808	2009-10-01	0.03432
2008-03-08	8.9	35.5	0.05	0.5		2010-06-27	-57.1667		2009-03-06	1.25	2009-12-08	0.376	2009-10-02	-0.29453
2008-03-09	9.2	33.5	0.05	0.47917		2010-06-28	-57.5417		2009-03-07	1.35	2009-12-09	0.3582	2009-10-03	-0.23104
2008-03-10	9.5	31	0.05	0.45417		2010-06-29	-60.25		2009-03-08	1.45	2009-12-10	0.3518	2009-10-04	0.05732
2008-03-11	9.8	29	0.35625	0.43333		2010-06-30	-59.875		2009-03-09	1.58	2009-12-11	0.357	2009-10-05	-0.80887
2008-03-12	9.5	46.5	10.1937	0.35833		2010-07-01	-59.3333		2009-03-10	1.58	2009-12-12	0.345	2009-10-06	0.10981
2008-03-13	9.4	42.5	19.4625	0.3875		2010-07-02	-59.5833		2009-03-11	1.5	2009-12-13	0.3428	2009-10-07	3.04428
2008-03-14	9.8	39	15.5	0.39167		2010-07-03	-57.9167		2009-03-12	1.552	2009-12-14	0.327	2009-10-08	0.50654
2008-03-15	10.8	36	10.6375	0.39167		2010-07-04	-58.7917		2009-03-13	0.99	2009-12-15	0.323	2009-10-09	0.5143
2008-03-16	11.5	34	7.0375	0.39167		2010-07-05	-59.4583		2009-03-14	1.164	2009-12-16	0.321	2009-10-10	3.37834
2008-03-17	11.7	32.5	4.71875	0.3875		2010-07-06	-61.625		2009-03-15	1.408	2009-12-17	0.3088	2009-10-11	2.28223
2008-03-18	12.9	41.5	3.3875	0.3625		2010-07-07	-57.0417		2009-03-16	1.618	2009-12-18	0.2948	2009-10-12	0.69682
2008-03-19	12.6	38	2.58125	0.39167		2010-07-08	-24.625		2009-03-17	1.792	2009-12-19	0.276	2009-10-13	-0.86402
2008-03-20	11.8	64.5	2.06875	0.4875		2010-07-09	-23.0417		2009-03-18	1.962	2009-12-20	0.258	2009-10-14	-1.26113
2008-03-21	11.5	55.5	1.725	0.7		2010-07-10	-24.25		2009-03-19	2.004	2009-12-21	0.242
2008-03-22	11.5	48.5	3.13125	0.725		2010-07-11	-30.5		2009-03-20	1.94	2009-12-22	0.231
2008-03-23	11.3	43.5	4.11875	0.72917		2010-07-12	-36		2009-03-21	1.86	2009-12-23	0.2264
2008-03-24	11.1	40	3.28125	0.71667		2010-07-13	-40.0417		2009-03-22	1.766	2009-12-24	0.223
2008-03-25	10.8	36.5	2.71875	0.69167		2010-07-14	-24.9583		2009-03-23	1.646	2009-12-25	0.2176
2008-03-26	11.5	34	2.325	0.67083		2010-07-15	-22.75		2009-03-24	1.45	2009-12-26	0.2076
2008-03-27	12.1	32	2.05625	0.65417		2010-07-16	-26.9583		2009-03-25	1.448	2009-12-27	0.197
2008-03-28	12.5	32.5	2.83125	0.62917		2010-07-17	-22.5		2009-03-26	1.4	2009-12-28	0.1864
2008-03-29	11.9	33	3.6375	0.6		2010-07-18	-22.7083		2009-03-27	1.324	2009-12-29	0.1812
2008-03-30	11.9	31.5	11.9	0.5375		2010-07-19	-27.25		2009-03-28	1.288	2009-12-30	0.1802
2008-03-31	12.2	30.5	16.9	0.47917		2010-07-20	-33.2917		2009-03-29	1.292	2009-12-31	0.1772
2008-04-01	12.1	29	12.825	0.425		2010-07-21	-38.7083		2009-03-30	1.3	2010-01-01	0.1883
2008-04-02	11.8	27.5	9.33125	0.37917		2010-07-22	-42.4167		2009-03-31	1.24	2010-01-02	0.19264
2008-04-03	12	26.5	6.8375	0.3375		2010-07-23	-22.5417		2009-04-01	1.13	2010-01-03	0.19931
2008-04-04	11.9	25	5.125	0.30417		2010-07-24	-21.375		2009-04-02	1.062	2010-01-04	0.19629
2008-04-05	13.1	23.5	4.0125	0.275		2010-07-25	-21.2917		2009-04-03	1.158	2010-01-05	0.19131
2008-04-06	14.5	22.5	3.2875	0.25		2010-07-26	-27.9583		2009-04-04	1.242	2010-01-06	0.18631
2008-04-07	16.3	21.5	2.90625	0.22917		2010-07-27	-33.875		2009-04-05	1.294	2010-01-07	0.18132
2008-04-08	15.9	66.5	2.74375	2.29583		2010-07-28	-39.625		2009-04-06	1.418	2010-01-08	0.17497
2008-04-09	15.7	55	2.075	3.85417		2010-07-29	-44.875		2009-04-07	1.656	2010-01-09	0.16765
2008-04-10	15.3	63.5	1.65625	3.6125		2010-07-30	-49.3333		2009-04-08	3.298	2010-01-10	0.16698
2008-04-11	14.4	63	1.39375	3.9		2010-07-31	-52.7917		2009-04-09	3.362	2010-01-11	0.16597
2008-04-12	13.3	54.5	1.2125	4.2		2010-08-01	-54.375		2009-04-10	2.17015	2010-01-12	0.1643
2008-04-13	13.8	49.5	1.06875	4.10833		2010-08-02	-55.1667		2009-04-11	2.23002	2010-01-13	0.16129
2008-04-14	14.7	45.5	0.95625	3.92083		2010-08-03	-57.1667		2009-04-12	2.33748	2010-01-14	0.15697
2008-04-15	15.7	41.5	0.875	3.70833		2010-08-04	-58.6667		2009-04-13	2.33716	2010-01-15	0.15364
2008-04-16	16.7	37.5	0.8125	3.47083		2010-08-05	-56.2083		2009-04-14	2.36622	2010-01-16	0.15231
2008-04-17	18.2	35	0.775	3.25833		2010-08-06	-19.5417		2009-04-15	2.27221	2010-01-17	0.15164
2008-04-18	18.4	56	65.4562	3.49583		2010-08-07	-25.9167		2009-04-16	2.09429	2010-01-18	0.15464
2008-04-19	17.6	67	99.45	20.6958		2010-08-08	-32.5417		2009-04-17	1.96338	2010-01-19	0.18099
2008-04-20	17.1	66.5	75.0125	23.8167		2010-08-09	-25.5		2009-04-18	1.94569	2010-01-20	0.18865
2008-04-21	15.9	66.5	72.725	23.7458		2010-08-10	-32.2083		2009-04-19	1.91553	2010-01-21	0.18397
2008-04-22	15	63	67.4375	24.5333		2010-08-11	-23.9167		2009-04-20	1.24172	2010-01-22	0.16728
2008-04-23	14.6	59.5	50.625	24.5792		2010-08-12	-24.7917		2009-04-21	1.47999	2010-01-23	0.16163
2008-04-24	15.1	56.5	37.0063	24.3792		2010-08-13	-22.9583		2009-04-22	1.6101	2010-01-24	0.15564
2008-04-25	16.5	52	27.5562	24.3583		2010-08-14	-26.9167		2009-04-23	1.37775	2010-01-25	0.15261
2008-04-26	17.7	47	20.8938	24.2458		2010-08-15	-31.125		2009-04-24	2.02858	2010-01-26	0.15063
2008-04-27	19.7	42	16.825	23.5208		2010-08-16	-35.25		2009-04-25	1.63819	2010-01-27	0.15762
2008-04-28	20.6	37.5	34.6625	22.0042		2010-08-17	-40.125		2009-04-26	1.3408	2010-01-28	0.16729
2008-04-29	21.4	33.5	74.825	20.4083		2010-08-18	-20.625		2009-04-27	1.25481	2010-01-29	0.17229
2008-04-30	22.2	29.5	84.075	18.7333		2010-08-19	-21.9583		2009-04-28	1.06474	2010-01-30	0.17662
2008-05-01	23.6	26	74.2687	17.3125		2010-08-20	-21		2009-04-29	0.66361	2010-01-31	0.17796
2008-05-02	24.7	23	65.3312	15.75		2010-08-21	-20.6667		2009-04-30	0.55997	2010-02-01	0.18096
2008-05-03	23.4	45	50	14.1792		2010-08-22	-25.4167		2009-05-01	0.04852	2010-02-02	0.18529
2008-05-04	22.3	42	35.675	13.4667		2010-08-23	-17.875		2009-05-02	0.54902	2010-02-03	0.18597
2008-05-05	22.5	38	25.5188	12.6667		2010-08-24	-18.5417		2009-05-03	0.83548	2010-02-04	0.18429
2008-05-06	23.7	34.5	19.4812	11.8958		2010-08-25	-19.5417		2009-05-04	1.16722	2010-02-05	0.1853
2008-05-07	24.4	64.5	13.775	14.0333		2010-08-26	-24.2083		2009-05-05	1.44183	2010-02-06	0.18397
2008-05-08	22.5	66.5	10.1	18.8917		2010-08-27	-28.0417		2009-05-06	1.82231	2010-02-07	0.18296
2008-05-09	21.8	62.5	7.53125	20.9583		2010-08-28	-30.75		2009-05-07	1.20751	2010-02-08	0.18397
2008-05-10	21.3	71	5.73125	12.5208		2010-08-29	-33.875		2009-05-08	0.56599	2010-02-09	0.18466
2008-05-11	21.1	65.5	4.46875	17.8667		2010-08-30	-36.7083		2009-05-09	0.39662	2010-02-10	0.174
2008-05-12	20.7	60	3.5875	20.8125		2010-08-31	-38.875		2009-05-10	1.7564	2010-02-11	0.16699
2008-05-13	20.4	54.5	15.35	22.0875		2010-09-01	-40.25		2009-05-11	1.53944	2010-02-12	0.16294
2008-05-14	21.1	49.5	14.4688	5.70417		2010-09-02	-40.7917		2009-05-12	1.67662	2010-02-13	0.16163
2008-05-15	22.6	44.5	9.225	5.71667		2010-09-03	-16.625		2009-05-13	0.32055	2010-02-14	0.16264
2008-05-16	24.1	40.5	5.4	5.48333		2010-09-04	-21.4167		2009-05-14	0.90514	2010-02-15	0.1573
2008-05-17	25	36	31.8562	5.12917		2010-09-05	-23.5417		2009-05-15	0.20635	2010-02-16	0.15329
2008-05-18	24.9	35	50.4562	4.44583		2010-09-06	-15.7917		2009-05-16	1.98166	2010-02-17	0.15059
2008-05-19	24.9	31	49.625	3.94583		2010-09-07	-20.2917		2009-05-17	2.85039	2010-02-18	0.1476
2008-05-20	24.7	28	15.2375	3.44167		2010-09-08	-24.125		2009-05-18	2.98728	2010-02-19	0.14894
2008-05-21	25.1	24.5	36.2812	2.95417		2010-09-09	-17.4167		2009-05-19	2.58103	2010-02-20	0.16527
2008-05-22	25.4	22	38.8312	2.5		2010-09-10	-22.0417		2009-05-20	2.99069	2010-02-21	0.19094
2008-05-23	25.8	20	32.1688	2.09167		2010-09-11	-26.1667		2009-05-21	3.08666	2010-02-22	0.23758
2008-05-24	26.3	18.5	24.7063	1.74167		2010-09-12	-30.4583		2009-05-22	2.73778	2010-02-23	0.28689
2008-05-25	27	17	18.4062	1.44167		2010-09-13	-34		2009-05-23	3.55577	2010-02-24	0.31395
2008-05-26	26.6	18	14.6562	1.16667		2010-09-14	-35.7083		2009-05-24	2.91642	2010-02-25	0.36019
2008-05-27	27.2	16.5	12.2937	0.97083		2010-09-15	-38.7083		2009-05-25	3.81788	2010-02-26	0.37051
2008-05-28	27.6	16	10.1875	0.81667		2010-09-16	-41.625		2009-05-26	3.09171	2010-02-27	0.37378
2008-05-29	26	15	7.6375	0.675		2010-09-17	-44.2083		2009-05-27	2.01364	2010-02-28	0.32299
2008-05-30	24.7	14.5	5.4625	0.56667		2010-09-18	-46.375		2009-05-28	0.57193	2010-03-01	0.3115
2008-05-31	24.6	14	3.5125	0.47917		2010-09-19	-46.0833		2009-05-29	2.67804	2010-03-02	0.33411
2008-06-01	25.8	13	2.31875	0.4125		2010-09-20	-45.5833		2009-05-30	2.62491	2010-03-03	0.30421
2008-06-02	26.2	24.5	1.6625	0.35417		2010-09-21	-32.2917		2009-05-31	2.82761	2010-03-04	0.31613
2008-06-03	26.4	23	1.29375	0.30833		2010-09-22	-27.875		2009-06-01	2.39229	2010-03-05	0.28994
2008-06-04	25.9	21.5	1.1	0.26667		2010-09-23	-29.0417		2009-06-02	2.25432	2010-03-06	0.2822
2008-06-05	26.7	20.5	1.00625	0.22917		2010-09-24	-13.4583		2009-06-03	1.94575	2010-03-07	0.27551
2008-06-06	25.8	45	0.96875	0.6		2010-09-25	-15.5		2009-06-04	2.33689	2010-03-08	0.27152
2008-06-07	25.5	41	1.00625	0.72917		2010-09-26	-18.4167		2009-06-05	1.83139	2010-03-09	0.25896
2008-06-08	25.6	37	0.95	0.77083		2010-09-27	-22.2917		2009-06-06	1.4043	2010-03-10	0.25367
2008-06-09	26.5	33.5	0.81875	0.77917		2010-09-28	-15.7917		2009-06-07	0.28631	2010-03-11	0.32739
2008-06-10	27	45	0.63125	0.59583		2010-09-29	-19.0417		2009-06-08	0.32483	2010-03-12	0.43863
2008-06-11	26.9	41	0.45625	0.69167		2010-09-30	-21.0417		2009-06-09	-2.01364	2010-03-13	-1.27959
2008-06-12	27.4	36.5	0.45625	0.7375		2010-10-01	-13.8333		2009-06-10	-0.57193	2010-03-14	-1.1848
2008-06-13	28.2	33	0.425	0.725		2010-10-02	-17.2917		2009-06-11	-2.67804	2010-03-15	-1.47314
2008-06-14	27.6	66	0.34375	4.0125		2010-10-03	-19.2917		2009-06-12	-2.62491	2010-03-16	-1.54319
2008-06-15	26.6	61	0.28125	5.98333		2010-10-04	-21.25		2009-06-13	-2.82761	2010-03-17	-1.34421
2008-06-16	25.1	64.5	6.8875	5.1		2010-10-05	-23.375		2009-06-14	-2.39229	2010-03-18	-1.40992
2008-06-17	25.6	58	7.39375	6.6375		2010-10-06	-25.4583		2009-06-15	-2.25432	2010-03-19	-1.6606
2008-06-18	26.8	51.5	4.85625	7.45		2010-10-07	-28.7917		2009-06-16	-1.94575	2010-03-20	-2.19018
2008-06-19	26.6	48	2.59375	6.69583		2010-10-08	-31.5		2009-06-17	-2.33689	2010-03-21	-2.47666
2008-06-20	27.4	43	3.5	6.4625		2010-10-09	-33.9167		2009-06-18	-1.83139	2010-03-22	-1.89036
2008-06-21	28.2	38	3.35	5.92083		2010-10-10	-13.6667		2009-06-19	-1.4043	2010-03-23	-2.62284
2008-06-22	27.1	55	2.34375	2.99583		2010-10-11	-16		2009-06-20	-0.28631	2010-03-24	-2.92918
2008-06-23	27.6	49.5	1.375	3.39167		2010-10-12	-13.875		2009-06-21	-3.9972	2010-03-25	-3.79241
2008-06-24	27.6	44.5	54.6562	3.42083		2010-10-13	-16.7083		2009-06-22	-4.68513	2010-03-26	-3.75658
2008-06-25	28	39.5	77.9313	3.22917		2010-10-14	-19.7083		2009-06-23	-4.38651	2010-03-27	-3.62447
2008-06-26	28.2	35.5	48.6562	2.8875		2010-10-15	-22.25		2009-06-24	-4.65037	2010-03-28	-4.14899
2008-06-27	28.5	31.5	54.1812	2.45417		2010-10-16	-23.875		2009-06-25	-3.70154	2010-03-29	-3.26669
2008-06-28	29	28	39.2563	20.9333		2010-10-17	-26.7917		2009-06-26	-3.75312	2010-03-30	-4.5358
2008-06-29	29.7	24.5	21.475	56.4625		2010-10-18	-27.75		2009-06-27	-2.6585	2010-03-31	-3.72193
2008-06-30	28.5	22	13.7188	86.4333		2010-10-19	-29.1667		2009-06-28	-1.43052	2010-04-01	-6.55755
2008-07-01	28	20.5	9.96875	110.688		2010-10-20	-29.4583		2009-06-29	-2.95508	2010-04-02	-6.5321
2008-07-02	28.3	19	9.65	129.683		2010-10-21	-27.25		2009-06-30	-3.92228	2010-04-03	-5.67442
2008-07-03	28.8	17.5	8.24375	143.946		2010-10-22	-28.25		2009-07-01	-3.35293	2010-04-04	-5.62763
2008-07-04	28.9	63	6.1125	155.929		2010-10-23	-29.0417		2009-07-02	-5.42901	2010-04-05	-5.77233
2008-07-05	28.3	64.5	4.075	161.562		2010-10-24	-11.9583		2009-07-03	-5.05955	2010-04-06	-7.24471
2008-07-06	28.3	57	2.8625	156.225		2010-10-25	-11		2009-07-04	-4.86128	2010-04-07	-7.54555
2008-07-07	29.1	50	1.875	146.621		2010-10-26	-10.375		2009-07-05	-2.09668	2010-04-08	-7.16208
2008-07-08	29.2	71	385.031	75.8167		2010-10-27	-10.625		2009-07-06	-1.96563	2010-04-09	-6.67772
2008-07-09	29.5	64	461.456	98.525		2010-10-28	-11.0833		2009-07-07	-1.34976	2010-04-10	-4.77253
2008-07-10	29.9	65.5	483.625	86.55		2010-10-29	-12.0833		2009-07-08	3.93297	2010-04-11	-5.53849
2008-07-11	29.8	58	483.925	92.0708		2010-10-30	-13.75		2009-07-09	-5.70024	2010-04-12	-9.98853
2008-07-12	30	52	471.494	91.9917		2010-10-31	-15.2917		2009-07-10	-1.24149	2010-04-13	-11.7255
2008-07-13	30.2	46.5	450.156	89.4125					2009-07-11	-1.63341	2010-04-14	-11.3658
2008-07-14	30.1	57.5	464.419	80.2333					2009-07-12	-3.09222	2010-04-15	-10.3655
2008-07-15	28.3	54.5	473.119	73.2208					2009-07-13	-2.3562	2010-04-16	-8.24264
2008-07-16	27.7	49.5	399.762	65.5708					2009-07-14	-2.23876	2010-04-17	-6.99266
2008-07-17	26.8	65.5	314.456	41.8125					2009-07-15	-3.7934	2010-04-18	-6.98613
2008-07-18	27.2	58	159.475	38.4333					2009-07-16	-7.34874	2010-04-19	-6.51412
2008-07-19	27.7	52.5	169.887	36.6583					2009-07-17	-0.25626	2010-04-20	-1.86289
2008-07-20	28.3	46.5	175.669	34.5208					2009-07-18	-7.97111	2010-04-21	-7.37724
2008-07-21	27.6	64.5	203.494	23.2375					2009-07-19	-5.97415	2010-04-22	-9.54287
2008-07-22	27.1	64	148.488	19.8208					2009-07-20	-2.96858	2010-04-23	-9.20404
2008-07-23	27.1	57.5	93.7375	21.0542					2009-07-21	-4.27752	2010-04-24	-6.83847
2008-07-24	28	51	55.675	20.8833					2009-07-22	-1.82036	2010-04-25	-7.98861
2008-07-25	28.7	45.5	37.2313	20.1917					2009-07-23	-6.57613	2010-04-26	-9.61434
2008-07-26	29.2	41	23.375	18.9125					2009-07-24	-7.12065	2010-04-27	-8.28527
2008-07-27	29.7	36	26.9125	17.1708					2009-07-25	-6.16691	2010-04-28	-9.57421
2008-07-28	30.3	31.5	30.4688	15.2292					2009-07-26	-4.3693	2010-04-29	-8.56011
2008-07-29	30.9	27.5	23.3188	13.2375					2009-07-27	-1.07995	2010-04-30	-7.24409
2008-07-30	31	70	15.0625	5.72917					2009-07-28	-6.4442	2010-05-01	-5.55154
2008-07-31	30.9	66	24.975	7.7625					2009-07-29	-4.83217	2010-05-02	-3.23494
2008-08-01	30.7	59	23.425	9.30833					2009-07-30	-3.13234	2010-05-03	-0.66083
2008-08-02	29.9	52.5	24.9062	9.47083					2009-07-31	-3.52579	2010-05-04	-1.65139
2008-08-03	29.7	47.5	19.3375	9.1					2009-08-01	-3.25982	2010-05-05	-4.41451
2008-08-04	29.9	42	13.2812	8.49167					2009-08-02	-5.3076	2010-05-06	-5.33203
2008-08-05	30.4	37	9.61875	7.675					2009-08-03	1.60221	2010-05-07	-3.57664
2008-08-06	31.1	32.5	7.225	6.75					2009-08-04	-0.73038	2010-05-08	-1.96225
2008-08-07	31.7	28.5	4.89375	5.77083					2009-08-05	-3.5065	2010-05-09	-13.939
2008-08-08	31.9	25	3.06875	4.80833					2009-08-06	-3.14244	2010-05-10	-10.2949
2008-08-09	30.6	22	2.1125	3.875					2009-08-07	-3.35592	2010-05-11	-5.23975
2008-08-10	29.9	20.5	40.0625	3.13333					2009-08-08	-3.46928	2010-05-12	-8.41679
2008-08-11	29.5	18.5	50.9813	2.53333					2009-08-09	-3.16965	2010-05-13	-1.95293
2008-08-12	28.3	44.5	36.575	2.17917					2009-08-10	-0.98101	2010-05-14	-5.01961
2008-08-13	27.7	64.5	21.3	3.12083					2009-08-11	-2.8642	2010-05-15	-4.06683
2008-08-14	27.6	58	12.65	3.82917					2009-08-12	-4.13913	2010-05-16	4.86185
2008-08-15	27.8	52	8.7875	4.02917					2009-08-13	-3.7778	2010-05-17	-2.90059
2008-08-16	27.3	48.5	5.9625	3.66667					2009-08-14	-3.28477	2010-05-18	-4.53579
2008-08-17	26.8	43	4.1	3.3625					2009-08-15	-2.96516	2010-05-19	-0.15021
2008-08-18	27.1	38.5	2.68125	3.05833					2009-08-16	1.15129	2010-05-20	-1.77938
2008-08-19	28.3	34.5	1.81875	2.79583					2009-08-17	-2.29241	2010-05-21	-2.57743
2008-08-20	28.9	65	1.33125	3.1625					2009-08-18	-2.30822	2010-05-22	-4.01115
2008-08-21	28.4	64.5	1.05625	4.35833					2009-08-19	-1.81525	2010-05-23	-6.71726
2008-08-22	28	58	5.46875	5.49583					2009-08-20	1.37333	2010-05-24	3.13258
2008-08-23	28	52	30.0562	5.79583					2009-08-21	2.0216	2010-05-25	-2.88371
2008-08-24	27.5	46.5	36.9625	5.475					2009-08-22	-0.01728	2010-05-26	2.17741
2008-08-25	27.7	43	26.35	4.93333					2009-08-23	-1.16929	2010-05-27	2.12382
2008-08-26	27.7	40.5	14.6875	4.21667					2009-08-24	-1.6629	2010-05-28	-6.44747
2008-08-27	28.1	38	8.71875	3.6					2009-08-25	-2.95039	2010-05-29	-2.52106
2008-08-28	28.6	36	6.34375	3.05					2009-08-26	-1.09409	2010-05-30	1.21868
2008-08-29	27.3	70	5.65	2.12917					2009-08-27	-3.20641	2010-05-31	1.34415
2008-08-30	26.2	68	31.8813	2.61667					2009-08-28	-1.59533	2010-06-01	-1.09915
2008-08-31	25.4	64	45.4937	3.03333					2009-08-29	1.01927	2010-06-02	1.40392
2008-09-01	24.8	60	50.6812	3.225					2009-08-30	-2.60945	2010-06-03	2.53747
2008-09-02	24.9	57	35.3813	3.225					2009-08-31	-3.36328	2010-06-04	2.70516
2008-09-03	25.2	54.5	20.2188	3.10417					2009-09-01	-2.67402	2010-06-05	4.41562
2008-09-04	25.3	52	11.8313	2.9					2009-09-02	-1.57764	2010-06-06	3.65529
2008-09-05	25.9	47.5	8.26875	2.7375					2009-09-03	-2.07944	2010-06-07	2.67194
2008-09-06	26.8	44.5	6.6	2.55833					2009-09-04	-1.00141	2010-06-08	3.68205
2008-09-07	27.2	40.5	5.9125	2.33333					2009-09-05	-1.20158	2010-06-09	3.92088
2008-09-08	26.4	38	14.2375	2.06667					2009-09-06	-2.03833	2010-06-10	4.32177
2008-09-09	25	39.5	21.6812	1.775					2009-09-07	0.40442	2010-06-11	3.82669
2008-09-10	23.4	44.5	24.825	1.5375					2009-09-08	2.03277	2010-06-12	4.45773
2008-09-11	22.7	41.5	20.9125	1.44167					2009-09-09	-1.68059	2010-06-13	4.58236
2008-09-12	23.1	39	15.0062	1.375					2009-09-10	0.37684
2008-09-13	23.8	37	11	1.3125					2009-09-11	0.63081
2008-09-14	25	35	9.0875	1.26667					2009-09-12	0.5314
2008-09-15	24.8	33	8.76875	1.20417					2009-09-13	1.43107
2008-09-16	25	31.5	8.3625	1.15					2009-09-14	-1.27198
2008-09-17	25.1	30	7.36875	1.10833					2009-09-15	-2.72349
2008-09-18	25	28.5	6.45625	1.06667					2009-09-16	-1.47203
2008-09-19	25.3	27	5.8875	1.0375					2009-09-17	-1.63381
2008-09-20	25.3	26	5.6	1.00833					2009-09-18	-1.32876
2008-09-21	26.1	24.5	5.34375	0.99583					2009-09-19	1.18914
2008-09-22	26.3	23.5	5.14375	0.97917					2009-09-20	-2.7506
2008-09-23	25.9	22	5.01875	0.9625					2009-09-21	-3.66208
2008-09-24	25.1	21	4.99375	0.9375					2009-09-22	-3.17555
2008-09-25	24.2	20	4.925	0.9125					2009-09-23	-3.06097
2008-09-26	21.8	70	4.86875	1.7875					2009-09-24	-0.64323
2008-09-27	19.8	70	4.8125	2.6375					2009-09-25	-1.76018
2008-09-28	18.9	70	4.75	3.24167					2009-09-26	-1.62556
2008-09-29	19.3	66	4.71875	3.97083					2009-09-27	-2.53777
2008-09-30	19.9	62.5	4.7	4.54167					2009-09-28	-2.05596
2008-10-01	20.6	59	4.725	4.75					2009-09-29	-2.01507
2008-10-02	21.6	56.5	4.7375	4.70833					2009-09-30	-1.73511
2008-10-03	21.6	54	4.70625	4.37083					2009-10-01	-2.42457
2008-10-04	22.3	52.5	4.6125	4.01667					2009-10-02	-2.61435
2008-10-05	21.7	51	4.48125	3.49583					2009-10-03	-1.71204
2008-10-06	20.7	49.5	18.225	3.00417					2009-10-04	-2.14499
2008-10-07	19.9	70	29.5437	2					2009-10-05	-2.76642
2008-10-08	19.8	66.5	36.5938	2.29167					2009-10-06	-1.87907
2008-10-09	19.2	63	47.3937	2.48333					2009-10-07	1.7638
2008-10-10	19	60	47.6875	2.5125					2009-10-08	-0.32858
2008-10-11	18.6	56.5	22.7792	2.42083					2009-10-09	-0.65674
2008-10-12	18.4	54.5	13.8833	2.28333					2009-10-10	2.01881
2008-10-13	18.9	53	8.25833	2.15					2009-10-11	1.41427
2008-10-14	19.6	51.5	5.57917	2					2009-10-12	-0.02223
2008-10-15	19.4	50	4.37083	1.8125					2009-10-13	-0.9387
2008-10-16	20.4	49	3.79167	1.69167					2009-10-14	-1.12259
2008-10-17	21.4	47.5	6.65	1.5875					2009-10-15	-0.96575
2008-10-18	21.3	62.5	9.59167	1.3625					2009-10-16	-1.11773
2008-10-19	20.5	61	9.9	1.375					2009-10-17	-1.02591
2008-10-20	20	59.5	7.7125	1.35833					2009-10-18	-0.86635
2008-10-21	19.7	56.5	5.47917	1.34167					2009-10-19	-0.77202
2008-10-22	17.7	70	4.025	1.40833					2009-10-20	-0.809
2008-10-23	16.3	67	3.29167	1.75833					2009-10-21	-0.6633
2008-10-24	15.9	64	2.98333	1.89583					2009-10-22	-0.81527
2008-10-25	15.3	61	2.8375	1.93333					2009-10-23	-0.7972
2008-10-26	15.4	58.5	2.83333	1.90833					2009-10-24	-0.45523
2008-10-27	15.3	57.5	2.95833	1.77083					2009-10-25	-0.61938
2008-10-28	15.4	70	4.59167	1.33333					2009-10-26	-0.40806
2008-10-29	16	67.5	4.6125	1.48333					2009-10-27	-0.46366
2008-10-30	15.8	64.5	4.15417	1.5875					2009-10-28	-0.34357
2008-10-31	16	62	3.72917	1.6375					2009-10-29	-0.34314
2008-11-01	16.5	58	7.71667	1.66667					2009-10-30	0.15376
2008-11-02	15.2	51.5	12.4583	1.64167					2009-10-31	-0.36856
2008-11-03	14.4	46	13.65	1.60833					2009-11-01	-1.287
2008-11-04	14.7	42	11.2583	1.5625					2009-11-02	-1.4303
2008-11-05	14.7	38.5	7.625	2.19583					2009-11-03	-1.01841
2008-11-06	14	36	4.80417	3.10833					2009-11-04	-0.89715
2008-11-07	14.4	33.5	4.36667	3.71667					2009-11-05	-0.81984
2008-11-08	14	31	6.54167	4.1					2009-11-06	-0.59493
2008-11-09	12.1	29.5	7.52917	4.27083					2009-11-07	-0.4537
2008-11-10	11.7	27.5	6.8	4.34167
2008-11-11	10.9	26.5	5.3625	4.325
2008-11-12	10.5	25	4.36667	4.25833
2008-11-13	10.9	30	3.85417	4.22083
2008-11-14	10.3	67.5	3.54583	4.175
2008-11-15	9.7	62	12.3917	4.35
2008-11-16	9.2	56	22.9833	4.36667
2008-11-17	9.1	50.5	28.2	4.3
2008-11-18	8.2	46	30.3583	4.20417
2008-11-19	7	43	30.1417	4.07083
2008-11-20	6.2	39.5	28.7792	3.89583
2008-11-21	5.8	37	26.8542	3.71667
2008-11-22	6.5	35	24.7208	3.54583
2008-11-23	7.2	32.5	23.8	3.3875
2008-11-24	7.3	30.5	25.0958	3.2375
2008-11-25	6.9	28.5	27.8458	3.0875
2008-11-26	6.3	27	27.2708	2.9375
2008-11-27	5.3	25.5	25.3292	2.7875
2008-11-28	4.7	24.5	23.4125	2.64167
2008-11-29	5	23	21.325	2.50417
2008-11-30	5.1	22.5	18.9667	2.37917
2008-12-01	5.7	21	16.7917	2.2625
2008-12-02	5.9	20	14.8667	2.15833
2008-12-03	6.5	19.5	13.1667	2.0625
2008-12-04	4.7	18.5	11.7583	1.9625
2008-12-05	2.7	18	10.5917	1.8625
2008-12-06	1.5	18	9.59583	1.75
2008-12-07	2.3	17	8.72083	1.625
2008-12-08	5.1	16.5	7.94167	1.55417
2008-12-09	6.2	16	7.24583	1.50833
2008-12-10	7	15.5	6.64167	1.46667
2008-12-11	6.5	15	6.14167	1.425
2008-12-12	6.3	14.5	5.7375	1.38333
2008-12-13	6.1	14.5	5.41667	1.34583
2008-12-14	5.3	14	5.14583	1.30417
2008-12-15	4.8	14	4.8375	1.2625
2008-12-16	4.1	13	4.15417	1.21667
2008-12-17	4	13	3.49167	1.175
2008-12-18	3.6	12.5	3.3875	1.1375
2008-12-19	3.4	15.5	3.37917	1.1
2008-12-20	3.6	15.5	3.4	1.07083
2008-12-21	1.9	15	3.39583	1.0375
2008-12-22	-0.5	15	3.39583	0.99167
2008-12-23	-1.5	15	3.40417	0.9125
2008-12-24	-1.5	15	3.4125	0.84167
2008-12-25	-0.9	15	3.39583	0.77917
2008-12-26	0.9	15	3.35833	0.72917
2008-12-27	0.4	15	3.29167	0.67917
2008-12-28	1.4	15	3.21667	0.6375
2008-12-29	0.4	15	3.25417	0.625
2008-12-30	-0.4	15	3.34167	0.57917
2008-12-31	0.8	15	3.34167	0.5375
2009-01-01	0.5	15	2.95833	0.5
2009-01-02	0	15	2.26667	0.46667
2009-01-03	0.6	14.5	1.74167	0.43333
2009-01-04	0.3	15	1.3375	0.40417
2009-01-05	0.1	15	1.21667	0.375
2009-01-06	0.3	15	1.09583	0.35
2009-01-07	0.3	15	1.0375	0.325
2009-01-08	-0.4	15	1.09167	0.3
2009-01-09	-1.1	15	0.84167	0.27917
2009-01-10	-1.1	15	0.65417	0.2625
2009-01-11	-1.4	15	0.50833	0.24167
2009-01-12	-2.1	15	0.39167	0.225
2009-01-13	-2.2	15	0.3	0.20833
2009-01-14	-2.2	15	0.23333	0.19583
2009-01-15	-2.2	15	0.17917	0.19167
2009-01-16	-1.8	15	0.1375	0.17917
2009-01-17	-0.5	15	0.10833	0.1625
2009-01-18	-0.3	15	0.08333	0.15
2009-01-19	0.9	15.5	0.0625	0.1375
2009-01-20	2.1	15.5	0.05	0.12917
2009-01-21	1.2	15	0.0375	0.12083
2009-01-22	-1.5	15	0.02917	0.1125
2009-01-23	-3.2	15	0.02083	0.10417
2009-01-24	-3.2	15	0.01667	0.10417
2009-01-25	-2.3	15	0.01667	0.09583
2009-01-26	-1.1	15	0.0125	0.0875
2009-01-27	-0.7	15	0.00833	0.08333
2009-01-28	0	15.5	0.00417	0.075
2009-01-29	0.9	15	0.0125	0.07083
2009-01-30	1.8	15	0.02083	0.0625
2009-01-31	2.8	17.5	0.02917	0.05833
2009-02-01	2.9	30.5	0.02917	0.05833
2009-02-02	3.2	29	0.02083	0.0625
2009-02-03	3.2	28.5	0.02083	0.05833
2009-02-04	3.3	27.5	0.0125	0.05417
2009-02-05	3.9	27	0.00833	0.05
2009-02-06	4.7	37.5	0.00833	0.05417
2009-02-07	4.6	66.5	0.00417	0.11667
2009-02-08	5.3	58.5	0.00833	4.92083
2009-02-09	6.1	52	0.01667	6.3875
2009-02-10	6.5	46.5	0.0375	16.575
2009-02-11	6.5	43	0.25417	17.3
2009-02-12	7.7	39.5	0.39167	18.0333
2009-02-13	8.6	37	0.33333	18.5333
2009-02-14	7.9	35	0.2875	18.5583
2009-02-15	7.4	32.5	0.25	18.45
2009-02-16	6.1	30.5	0.48333	17.9833
2009-02-17	4.6	28.5	2.92083	17.2417
2009-02-18	5	47	4.64583	16.9667
2009-02-19	4.8	43.5	3.975	17.3917
2009-02-20	5.3	40	3.32917	17.1583
2009-02-21	6	37	2.50833	17.1167
2009-02-22	6.4	35	1.95	17.1583
2009-02-23	6.4	37	1.58333	17.0417
2009-02-24	5.3	35	1.35	16.7167
2009-02-25	4.1	53.5	1.15833	15.6667
2009-02-26	4.3	48.5	1.00833	16.425
2009-02-27	5	44.5	0.87083	16.4083
2009-02-28	5.6	40.5	1.675	16.5833
2009-03-01	5.1	38.5	4.64583
2009-03-02	4.6	36	3.975	17.1583
2009-03-03	5	33.5	3.32917	17.1167
2009-03-04	5.4	31.5	2.50833	17.1583
2009-03-05	5.5	30	1.95	17.0417
2009-03-06	6.4	29	1.58333	16.7167
2009-03-07	7.2	27	1.35	15.6667
2009-03-08	8	26	1.15833	16.425
2009-03-09	8.9	25	1.00833	16.4083
2009-03-10	7.9	31.5	0.87083	16.5833
2009-03-11	7.5	30	1.675	16.5667
2009-03-12	6.6	29	1.37	16.425
2009-03-13	6.2	28	1.18	16.4417
2009-03-14	7.9	26.5	1.05	16.5167
2009-03-15	9.8	26	0.95	16.55
2009-03-16	11.3	24.5	0.62	15.0333
2009-03-17	12.5	23.5	0.47	13.5417
2009-03-18	13.8	22.5	0.39	12.175
2009-03-19	14.2	21.5	0.34	10.9333
2009-03-20	14	20.5	0.58	9.75
2009-03-21	13.7	20	0.73	8.86667
2009-03-22	13.3	19.5	0.67	15.7167
2009-03-23	12.7	18.5	0.63	14.2
2009-03-24	11.5	18	0.61	13.2333
2009-03-25	11.5	20	0.58	12.3833
2009-03-26	10.7	23	0.57	11.55
2009-03-27	10.3	23.5	0.56	10.7833
2009-03-28	10.3	22.5	0.57	10.15
2009-03-29	10.7	22	0.58	9.58333
2009-03-30	10.6	24	0.6	9.11667
2009-03-31	10.4	23	0.63	8.8
2009-04-01	9.7	22.5	0.66	8.56667
2009-04-02	9.4	21	0.68	8.41667
2009-04-03	10.5	20.5	0.7	8.3
2009-04-04	11.5	20	0.93	9.03333
2009-04-05	12.1	19	1.43	10.8833
2009-04-06	13.4	19	1.6	11.8833
2009-04-07	15.6	18	1.48	11.9167
2009-04-08	16.9	67	1.41	12
2009-04-09	17.3	55	1.53	12.7167
2009-04-10	17.2	48	1.61	13.3667
2009-04-11	17.6	42.5	1.51	13.3667
2009-04-12	18.4	38	1.41	13.3
2009-04-13	19.3	35.5	1.33	13.2167
2009-04-14	19.3	40	1.26	13.1333
2009-04-15	18.4	37	1.2	3.27083
2009-04-16	18.4	34.5	1.16	3.26667
2009-04-17	18.8	32.5	1.13	3.27917
2009-04-18	18.5	33	20.28	1.29167
2009-04-19	18.3	31	47	2.97083
2009-04-20	17	29.5	49.75	4.04583
2009-04-21	16.5	63	46.28	4.975
2009-04-22	16.2	58.5	44.31	5.89583
2009-04-23	16.3	51.5	41	6.77917
2009-04-24	15.7	45.5	40.51	6.54167
2009-04-25	15.3	41	40.6	7.175
2009-04-26	15.5	37.5	34.46	7.6
2009-04-27	16.7	34.5	29.73	7.45
2009-04-28	18.4	32.5	26.31	7.07917
2009-04-29	18.7	30	22.72	6.75833
2009-04-30	19.4	28.5	19.71	6.07083
2009-05-01	19.5	27.5	31.67	5.8625
2009-05-02	19.7	26	40.59	7.1125
2009-05-03	20.5	24.5	39	7.875
2009-05-04	20.9	23.5	30.23	7.97917
2009-05-05	21.8	22.5	21.34	7.76667
2009-05-06	22.1	21.5	13.69	7.44167
2009-05-07	22.7	30.5	9.44	7.1125
2009-05-08	21.8	62	7.05	6.67917
2009-05-09	20.3	63.5	5.62	5.97083
2009-05-10	19	63.5	4.57	5.32917
2009-05-11	19.4	55	3.03	4.65833
2009-05-12	19	63.5	2.28	4.075
2009-05-13	17.8	66.5	1.84	3.63333
2009-05-14	16.6	67	1.55	3.1875
2009-05-15	17.3	58	1.33	2.79167
2009-05-16	17.7	51	1.14	2.40417
2009-05-17	18	45	1.16	2.0125
2009-05-18	18.1	40.5	19.63	3.19167
2009-05-19	19.1	37	25.77	4.12917
2009-05-20	20	35	25.37	4.53333
2009-05-21	18.9	34	29.92	5.6375
2009-05-22	18.6	32	16.27	4.575
2009-05-23	19	30.5	16.98	4.94583
2009-05-24	19.6	28.5	19.06	5.3125
2009-05-25	19.7	27.5	24.33	6.55417
2009-05-26	18.9	68	19.51	7.15
2009-05-27	18.8	64.5	12.2	7.22083
2009-05-28	18.5	56.5	7.05	6.875
2009-05-29	19.3	49.5	4.1	6.46667
2009-05-30	20.3	43	2.68	5.77917
2009-05-31	20.8	39	2.01	4.81667
2009-06-01	21.6	35.5	1.59	4.22917
2009-06-02	22.3	33	1.25	3.71667
2009-06-03	22.6	31	0.92	3.2375
2009-06-04	23.3	29	0.72	2.72083
2009-06-05	24.6	28	16.55	3.58333
2009-06-06	23.7	34	34.53	5.76667
2009-06-07	23.6	45.5	44.39	7.1125
2009-06-08	23.6	40.5	31.97	7.8625
2009-06-09	23.6	36.5	17.28	8.125
2009-06-10	23.5	34	8.29	7.74167
2009-06-11	23.5	35	4.08	7.075
2009-06-12	23.9	33.5	2.3	6.21667
2009-06-13	25.2	31.5	1.5	5.2125
2009-06-14	25.9	30	1.11	4.34583
2009-06-15	26.9	29	0.77	3.6
2009-06-16	25.9	40.5	0.67	2.44167
2009-06-17	26	57	0.9	1.675
2009-06-18	24.3	61	1.19	1.65833
2009-06-19	24.1	51.5	1.13	1.57917
2009-06-20	24.1	44.5	0.98	1.42917
2009-06-21	24.6	39	0.69	1.17917
2009-06-22	25.2	36	0.46	1.0625
2009-06-23	25.9	33	0.35	0.91667
2009-06-24	26.3	31	0.28	0.75417
2009-06-25	27.4	29.5	0.24	0.60417
2009-06-26	27.1	28	0.33	0.39167
2009-06-27	24.9	27.5	2.1	1.00833
2009-06-28	23.8	26.5	13.58	2.09583
2009-06-29	24.6	25.5	16.45	2.82917
2009-06-30	25	24	10.2	3.1
2009-07-01	25.8	22.5	5.29	3.07917
2009-07-02	26.6	21.5	2.71	2.90833
2009-07-03	26.7	21	1.51	2.6
2009-07-04	27.2	20	0.88	2.19583
2009-07-05	27.9	19	0.56	1.8375
2009-07-06	28.6	18.5	0.29	1.40833
2009-07-07	28.6	39	0.18	1.00417
2009-07-08	27.9	34.5	278.21	20.5083
2009-07-09	26.8	32	322.06	55.3292
2009-07-10	26.3	70	346.11	82.9333
2009-07-11	26.4	62	352.75	104.996
2009-07-12	26.1	63.5	346.94	122.233
2009-07-13	25.6	55	331.13	134.762
2009-07-14	25.9	47	308.95	143.146
2009-07-15	27.2	41	283.65	148.292
2009-07-16	27	37.5	257.22	150.717
2009-07-17	27.6	34	242.63	151.7
2009-07-18	28.4	32	218.15	145.179
2009-07-19	28.6	30	185.89	133.375
2009-07-20	28.5	67.5	118.64	64.5458
2009-07-21	26.7	64.5	119.1	74.5125
2009-07-22	26.5	54.5	120.88	66.0625
2009-07-23	27	46.5	143.28	66.1083
2009-07-24	27	40.5	109.7	63.7917
2009-07-25	26.1	38.5	67.91	61.25
2009-07-26	25.7	37.5	41.32	56.775
2009-07-27	25.3	35	26.64	51.4792
2009-07-28	25.5	32.5	18.15	45.9125
2009-07-29	25.7	31	12.86	40.3875
2009-07-30	25.6	33	87.67	29.3208
2009-07-31	25.9	31.5	136.01	33.75
2009-08-01	26.4	31	150.96	39.6833
2009-08-02	25.5	43.5	106.56	40.4
2009-08-03	25.3	39	59.53	38.3708
2009-08-04	25.5	35	32.09	34.3333
2009-08-05	25.4	33.5	18.44	30.0042
2009-08-06	25.8	32	10.91	26.2542
2009-08-07	26.4	30	6.43	22.5292
2009-08-08	26.6	29	3.81	18.675
2009-08-09	25.5	28	2.32	18.8917
2009-08-10	25.1	26.5	1.43	15.6375
2009-08-11	25	25.5	0.94	13.2333
2009-08-12	25.6	24.5	0.78	10.8
2009-08-13	25.9	23	0.68	9.32083
2009-08-14	26.8	22	0.53	8.01667
2009-08-15	26.8	35	0.41	6.8375
2009-08-16	27.1	32.5	0.35	5.79583
2009-08-17	26.5	56	0.32	4.88333
2009-08-18	25.8	59	0.28	4.0875
2009-08-19	24.9	50	0.25	3.38333
2009-08-20	24.1	61	0.23	2.78333
2009-08-21	22.9	63	0.21	2.28333
2009-08-22	23.3	54	0.19	1.875
2009-08-23	24.3	46	0.17	1.54167
2009-08-24	25.5	61.5	0.16	1.26667
2009-08-25	24.5	68	0.21	1.05417
2009-08-26	24.8	53.5	0.21	0.88333
2009-08-27	24.3	64.5	1.39	1.38333
2009-08-28	22.2	67	2.57	2.025
2009-08-29	21.5	55	3.06	2.37083
2009-08-30	21.7	46.5	2.6	1.75
2009-08-31	22	41.5	6.69	2.2125
2009-09-01	22.3	38	8.73	2.77083
2009-09-02	23.1	35	6.21	3
2009-09-03	23.8	32.5	18.31	3.30417
2009-09-04	24.8	30	37.83	6.34167
2009-09-05	26	29	71.33	8.70833
2009-09-06	24.6	27.5	33.47	7.3
2009-09-07	22.3	26	31.85	7.86667
2009-09-08	21.5	25	47.84	9.2625
2009-09-09	20.9	24	31.92	10.75
2009-09-10	20.2	26	14.26	10.9792
2009-09-11	19.7	48	5.7	10.4
2009-09-12	18.9	68	2.69	9.5
2009-09-13	18.7	56.5	1.76	8.37083
2009-09-14	19.2	48.5	1.53	7.19583
2009-09-15	19.8	56	1.57	6.0625
2009-09-16	20.4	58.5	1.5	4.65
2009-09-17	14.7	53.5	1.3	3.56667
2009-09-18	16.5	66.5	1.15	2.9125
2009-09-19	16.5	60.5	1.09	2.40833
2009-09-20	16.9	51.5	1.09	1.92917
2009-09-21	17.4	45	3.88	1.54583
2009-09-22	18.3	40.5	11.38	2.43333
2009-09-23	18.7	39	21.19	3.25833
2009-09-24	18.8	36.5	16.58	3.74167
2009-09-25	19.9	34	6.93	2.75833
2009-09-26	20.7	31.5	5.69	2.69583
2009-09-27	20.5	30	5.08	2.60417
2009-09-28	20.9	28.5	7.13	2.55417
2009-09-29	21.1	27	11.2	2.95417
2009-09-30	21.3	26	12.01	3.39583
2009-10-01	20.9	25	7.64	3.64167
2009-10-02	20.1	23	4.31	3.66667
2009-10-03	20.3	22.5	2.63	3.2625
2009-10-04	19.6	21.5	1.95	3.06667
2009-10-05	19.5	51.5	1.63	2.89167
2009-10-06	18.5	57.5	1.48	2.62917
2009-10-07	17.6	50.5	1.35	2.31667
2009-10-08	17.3	45.5	1.26	2.09167
2009-10-09	16.8	49.5	1.23	1.87917
2009-10-10	16.3	63.5	1.21	1.6875
2009-10-11	16	60.5	1.2	1.49583
2009-10-12	16.2	52	1.19	1.32917
2009-10-13	16.1	46.5	1.18	1.20833
2009-10-14	15.7	42	1.16	1.0875
