# Supplementary material for: Using a modified DNDC biogeochemical model to optimize field management of a multi-crop (cotton, wheat, and maize) system: a site-scale case study in northern China
Source: Copernicus journal article supplement (doi:10.5194/bg-16-2905-2019), 2019-07-31
Supplement: Supplementary file 1 [file bg-16-2905-2019-supplement.zip › Supplementary materials.pdf]

## Supplementary materials

Table S1 The information of yields, cumulative CH<sub>4</sub>, N<sub>2</sub>O, NO, NH<sub>3</sub>, NEE and NO<sub>3</sub><sup>-</sup> leaching from cotton (C) and winter wheat-summer maize (W-M) cropping systems used in this study for evaluating the model performance on annual or seasonal scale.

|                              | Period                | Crop | Treatment        | Ref <sup>b</sup> |
|------------------------------|-----------------------|------|------------------|------------------|
| Yield                        | 2005.10–2006.10       | W-M  | CT/IT            | [4]              |
|                              | 2006.10–2007.10       | W-M  | CT/IT            | [4]              |
|                              | 2007.10–2008.10       | W-M  | All <sup>a</sup> | [4]              |
|                              | 2008.10–2009.10       | W-M  | All              | [4], [5]         |
|                              | 2009.10–2010.10       | W-M  | All              | [4], [5]         |
|                              | 2007.10–2008.10       | C    |                  | [3], [7]         |
|                              | 2008.10–2009.10       | C    |                  | [3], [7]         |
|                              | 2009.10–2010.10       | C    |                  | [3], [7]         |
| CH <sub>4</sub>              | 2009.10.19–2010.10.15 | W-M  | N135             | [5]              |
|                              | 2009.10.19–2010.10.15 | W-M  | N270             | [5]              |
|                              | 2009.10.19–2010.10.15 | W-M  | N430             | [5]              |
|                              | 2009.10.19–2010.10.15 | W-M  | N650             | [5]              |
|                              | 2009.10.19–2010.10.15 | W-M  | N850             | [5]              |
|                              | 2008.11.06–2009.11.07 | C    |                  | [9]              |
|                              | 2009.11.08–2010.11.05 | C    |                  | [9]              |
| N <sub>2</sub> O/NO          | 2008.10.11–2009.10.15 | W-M  | WS               | [4]              |
|                              | 2008.10.11–2009.10.15 | W-M  | NS               | [4]              |
|                              | 2009.10.20–2010.10.15 | W-M  | U                | [6]              |
|                              | 2009.10.20–2010.10.15 | W-M  | DCD              | [6]              |
|                              | 2009.10.20–2010.10.15 | W-M  | DMPP             | [6]              |
|                              | 2009.10.19–2010.10.15 | W-M  | N135             | [5], [8]         |
|                              | 2009.10.19–2010.10.15 | W-M  | N270             | [5], [8]         |
|                              | 2009.10.19–2010.10.15 | W-M  | N430             | [5], [8]         |
|                              | 2009.10.19–2010.10.15 | W-M  | N650             | [5], [8]         |
|                              | 2009.10.19–2010.10.15 | W-M  | N850             | [5], [8]         |
|                              | 2007.10.11–2008.10.10 | C    |                  | [2], [3], [7]    |
|                              | 2008.10.11–2009.10.15 | C    |                  | [2], [3], [7]    |
| NH <sub>3</sub>              | 2008.03.18–2008.03.28 | W-M  | CT               | [10]             |
|                              | 2008.03.18–2008.03.28 | W-M  | IT               | [10]             |
|                              | 2008.07.09–2008.07.24 | W-M  | WS               | [1]              |
| NEE                          | 2008.10.15–2009.06.05 | W-M  | WS               | [9]              |
|                              | 2009.10.1–2010.06.16  | W-M  | U                | [9], [11]        |
|                              | 2010.6.17–2010.10.17  | W-M  | U                | [9], [11]        |
|                              | 2008.11.06–2009.11.07 | C    |                  | [9]              |
|                              | 2009.11.08–2010.11.05 | C    |                  | [9]              |
| NO <sub>3</sub> <sup>-</sup> | 2007.10.11–2008.10.10 | C    |                  | [7]              |
|                              | 2008.10.11–2009.10.15 | C    |                  | [7]              |

<sup>a</sup> All, including all the treatment for winter wheat-summer maize cropping system.

<sup>b</sup> References

- [1] Cui, F., Zheng, X., Liu, C., Wang, K., Zhou, Z., and Deng, J.: Assessing biogeochemical effects and best management practice for a wheat–maize cropping system using the DNDC model, *Biogeosciences*, 11, 91–107, 2014.
- [2] Li, M., Liang, W., Zheng, X., Yang, Z., Zheng, P., Chen, Y., and Chen, D.: Characteristics of NO emission from typical saline soil of southern Shanxi cotton land, *Climatic Environ. Res.*, 14, 318–328, 2009 (in Chinese).
- [3] Liu, C., Zheng, X., Zhou, Z., Han, S., Wang, Y., Wang, K., Liang, W., Li, M., Chen, D., and Yang, Z.: Nitrous oxide and nitric oxide emissions from an irrigated cotton field in Northern China, *Plant Soil*, 332, 123–134, 2010.
- [4] Liu, C., Wang, K., Meng, S., Zheng, X., Zhou, Z., Han, S., Chen, D., and Yang, Z.: Effects of irrigation, fertilization and crop straw management on nitrous oxide and nitric oxide emissions from a wheat–maize rotation field in northern China, *Agr. Ecosyst. Environ.*, 140, 226–233, 2011.
- [5] Liu, C., Wang, K., and Zheng, X.: Responses of N<sub>2</sub>O and CH<sub>4</sub> fluxes to fertilizer nitrogen addition rates in an irrigated wheat-maize cropping system in northern China, *Biogeosciences*, 9, 839–850, 2012.
- [6] Liu, C., Wang, K., and Zheng, X.: Effects of nitrification inhibitors (DCD and DMPP) on nitrous oxide emission, crop yield and nitrogen uptake in a wheat–maize cropping system, *Biogeosciences*, 10, 2427–2437, 2013.
- [7] Liu, C., Yao, Z., Wang, K., and Zheng, X.: Three-year measurements of nitrous oxide emissions from cotton and wheat–maize rotational cropping systems, *Atmos. Environ.*, 96, 201–208, 2014.
- [8] Liu, C., Yao, Z., Wang, K., and Zheng, X.: Effects of increasing fertilization rates on nitric oxide emission and nitrogen use efficiency in low carbon calcareous soil, *Agr. Ecosyst. Environ.*, 203, 83–92, 2015.
- [9] Liu, C., Yao, Z., Wang, K., Zheng, X., and Li, B.: Net ecosystem carbon and greenhouse gas budgets in fiber and cereal cropping systems, *Sci. Total Environ.*, 647, 895–904, 2019.
- [11] Tong, H., Zheng, X., Wang, R., Zhou, Z., Yue, J., Liu, C., Li, M., Liang, W., and Dong, H.: A preliminary study of measurement of NH<sub>3</sub> volatilization from cropland using Qusi-dynamic chamber, *Clim. Environ. Res.*, 14(4), 373–382, 2009 (in Chinese).
- [10] Wang, K., Liu, C., Zheng, X., Pihlatie, M., Li, B., Haapanala, S., Vesala, T., Liu, H., Wang, Y., Liu, G., and Hu, F.: Comparison between eddy covariance and automatic chamber techniques for measuring net ecosystem exchange of carbon dioxide in cotton and wheat fields, *Biogeosciences*, 10, 6865–6877, 2013.

Table S2 The calibrated parameters of new algorithm for NEE simulation.

| Parameter             | Cotton | Wheat  | Maize   |
|-----------------------|--------|--------|---------|
| <i>a</i>              | 0.1    | 0.1    | 0.2     |
| <i>b</i>              | 680    | 2440   | 2500    |
| <i>c</i>              | 4.4    | 4      | 6.4     |
| <i>g</i>              | 24     | 0.0006 | 0.00016 |
| <i>h</i>              | 17     | 18.2   | 16.4    |
| <i>i</i>              | 125    | 411    | 393     |
| <i>j</i>              | 3      | 4.4    | 6       |
| <i>l</i>              | 51     | 25     | 23      |
| <i>m</i>              | 30     | 26     | 23      |
| <i>d</i> <sub>1</sub> | 0.2    | 0.2    | 0.2     |
| <i>d</i> <sub>2</sub> | 0.5    | 0.8    | 1.0     |

Table S3 Details of the field management practices for the cotton cropping system with observations for model validation <sup>a</sup>.

| Date (yyyy-mm-dd) | Management practices                                                                                                                          |
|-------------------|-----------------------------------------------------------------------------------------------------------------------------------------------|
| 2007-11-09        | Incorporation of aboveground residues (100%: 1.9 Mg C ha <sup>-1</sup> and 57 kg N ha <sup>-1</sup> on average) by plow tillage (30 cm depth) |
| 2008-04-09        | Tillage (20 cm)                                                                                                                               |
| 2008-04-14        | Sowing and film mulch (70% of covered soil surface area)                                                                                      |
| 2008-07-01        | Fertilization (band placement, 5 cm depth; urea: 59 kg N ha <sup>-1</sup> ; diammonium hydrogen phosphate: 7 kg N ha <sup>-1</sup> )          |
| 2008-07-11        | Irrigation (88.5 mm)                                                                                                                          |
| 2008-08-02        | Irrigation (95.7 mm)                                                                                                                          |
| 2008-08-23        | First cotton grain harvest (914.75 kg ha <sup>-1</sup> )                                                                                      |
| 2008-09-16        | Second cotton grain harvest (914.75 kg ha <sup>-1</sup> )                                                                                     |
| 2008-10-03        | Third cotton grain harvest (914.75 kg ha <sup>-1</sup> )                                                                                      |
| 2008-10-26        | Last cotton grain harvest (914.75 kg ha <sup>-1</sup> )                                                                                       |
| 2008-11-05        | Cutting cotton stems (machinery)                                                                                                              |
| 2008-11-06        | Incorporation of aboveground residues (100%: 2.1 Mg C ha <sup>-1</sup> and 61 kg N ha <sup>-1</sup> on average) by plow tillage (30 cm)       |
| 2009-03-14        | Tillage (20 cm)                                                                                                                               |
| 2009-04-09        | Irrigation (35.5 mm)                                                                                                                          |
| 2009-04-10        | Sowing and film mulch (70% of covered soil surface area)                                                                                      |
| 2009-06-28        | Fertilization (urea: 68 kg N ha <sup>-1</sup> ; diammonium hydrogen phosphate: 7 kg N ha <sup>-1</sup> )                                      |
| 2009-07-13        | Irrigation (85.3 mm)                                                                                                                          |
| 2008-08-18        | First cotton grain harvest (842.5 kg ha <sup>-1</sup> )                                                                                       |
| 2009-08-21        | Irrigation (58.5 mm)                                                                                                                          |
| 2008-09-23        | Second cotton grain harvest (842.5 kg ha <sup>-1</sup> )                                                                                      |
| 2008-10-09        | Third cotton grain harvest (842.5 kg ha <sup>-1</sup> )                                                                                       |
| 2008-11-08        | Last cotton grain harvest (842.5 kg ha <sup>-1</sup> )                                                                                        |
| 2009-12-02        | Cutting cotton stems (machinery)                                                                                                              |
| 2009-12-04        | Incorporation of aboveground residues (100%: 1.6 Mg C ha <sup>-1</sup> and 53 kg N ha <sup>-1</sup> on average) by plow tillage (30 cm)       |

<sup>a</sup> Li et al. (2009), Liu et al. (2010, 2014), Wang et al. (2013), and the authors' unpublished data.

#### References

- Li, M., Liang, W., Zheng, X., Yang, Z., Zheng, P., Chen, Y., and Chen, D.: Characteristics of NO emission from typical saline soil of southern Shanxi cotton land, *Climatic Environ. Res.*, 14, 318–328, 2009 (in Chinese).
- Liu, C., Yao, Z., Wang, K., and Zheng, X.: Three-year measurements of nitrous oxide emissions from cotton and wheat–maize rotational cropping systems, *Atmos. Environ.*, 96, 201–208, 2014.
- Liu, C., Zheng, X., Zhou, Z., Han, S., Wang, Y., Wang, K., Liang, W., Li, M., Chen,

- D., and Yang, Z.: Nitrous oxide and nitric oxide emissions from an irrigated cotton field in Northern China, *Plant Soil*, 332, 123–134, 2010.
- Wang, K., Liu, C., Zheng, X., Pihlatie, M., Li, B., Haapanala, S., Vesala, T., Liu, H., Wang, Y., Liu, G., and Hu, F.: Comparison between eddy covariance and automatic chamber techniques for measuring net ecosystem exchange of carbon dioxide in cotton and wheat fields, *Biogeosciences*, 10, 6865–6877, 2013.

Table S4 Details of the baseline field management practices except for irrigation.

| Crop   | Date (mm-dd)             | Management                                                               |
|--------|--------------------------|--------------------------------------------------------------------------|
| Cotton | 04-09 <sup>a</sup>       | Fertilization (urea: 43 kg N ha <sup>-1</sup> )                          |
|        | 04-10                    | Tillage (20 cm)                                                          |
|        | 04-14                    | Sowing and film mulch (70% area)                                         |
|        | 06-27                    | Fertilization (band application, 5 cm; urea: 67 kg N ha <sup>-1</sup> )  |
|        | 10-23 <sup>b</sup>       | Final grain harvest                                                      |
|        | 10-24/11-06 <sup>c</sup> | Stem cutting and fully incorporation by plow tillage (30 cm depth)       |
| Wheat  | 10-24 <sup>a</sup>       | Fertilization (urea: 60 kg N ha <sup>-1</sup> )                          |
|        | 10-25                    | Tillage (20 cm); sowing                                                  |
|        | 03-06                    | Fertilization (band application, 5 cm; urea: 120 kg N ha <sup>-1</sup> ) |
|        | 06-03                    | Harvest; straw incorporation (100%)                                      |
| Maize  | 06-06                    | Tillage (20 cm); sowing                                                  |
|        | 07-11                    | Fertilization (band application, 5 cm; urea: 250 kg N ha <sup>-1</sup> ) |
|        | 10-14                    | Harvest; straw incorporation (100%)                                      |

<sup>a</sup> As it is assumed that there is no limit of phosphorous and potassium supplies, a minor nitrogen dose (approximately 5–10% of the total fertilizer nitrogen dose) in form of diammonium hydrogen phosphate is regarded as part of applied urea.

<sup>b</sup> Although there are four agronomic harvests, the model calculation needs to know the date of the final one to terminate the cotton growing season and accumulation of the daily grain production.

<sup>c</sup> The operations were performed immediately after the final cotton grain harvest if the wheat is planted in the following season.

Table S5 Baseline irrigation dates and amounts depending on precipitation.

| Year | Cotton       |             | Winter wheat–summer maize |             |
|------|--------------|-------------|---------------------------|-------------|
|      | Date (mm-dd) | Amount (mm) | Date (mm-dd)              | Amount (mm) |
| 1    | 07-15        | 106.3       | 03-15                     | 106.3       |
|      | 08-20        | 75          | 04-25                     | 100         |
|      |              |             | 06-10                     | 50          |
|      |              |             | 08-15                     | 31.3        |
|      |              |             | 12-18                     | 106.3       |
| 2    | 07-11        | 106.3       | 03-23                     | 75          |
|      | 08-13        | 112.5       | 04-25                     | 100         |
|      |              |             | 06-08                     | 125         |
|      |              |             | 08-10                     | 31.3        |
| 3    | 08-21        | 75          | 01-05                     | 106.3       |
|      |              |             | 03-21                     | 75          |
|      |              |             | 06-18                     | 75          |
|      |              |             | 08-10                     | 31.3        |
|      |              |             | 12-20                     | 106.3       |
| 4    | 07-16        | 106.3       | 03-10                     | 106.3       |
|      | 08-15        | 112.5       | 04-19                     | 100         |
|      |              |             | 06-18                     | 75          |
|      |              |             | 08-07                     | 100         |
|      |              |             | 12-21                     | 106.3       |
| 5    | 07-11        | 106.3       | 03-15                     | 106.3       |
|      | 08-21        | 75          | 04-28                     | 100         |
|      |              |             | 06-18                     | 75          |
|      |              |             | 07-17                     | 81.3        |
|      |              |             | 08-14                     | 31.3        |
|      |              |             | 12-28                     | 106.3       |
| 6    | 07-09        | 106.3       | 03-15                     | 106.3       |
|      | 08-23        | 75          | 04-19                     | 100         |
|      |              |             | 06-08                     | 125         |
|      |              |             | 08-13                     | 31.3        |
|      |              |             | 12-28                     | 75          |
| 7    | 07-18        | 106.3       | 03-23                     | 106.3       |
|      | 08-23        | 75          | 04-25                     | 100         |
|      |              |             | 06-07                     | 50          |
|      |              |             | 08-18                     | 31.3        |
|      |              |             | 12-20                     | 75          |
| 8    | 07-15        | 106.3       | 03-19                     | 106.3       |
|      | 08-24        | 75          | 04-20                     | 100         |
|      |              |             | 06-18                     | 50          |
|      |              |             | 08-13                     | 31.3        |

|    |       |       |       |       |
|----|-------|-------|-------|-------|
|    |       |       | 12-31 | 106.3 |
| 9  | 04-10 | 43.8  | 03-16 | 106.3 |
|    | 07-20 | 106.3 | 04-22 | 100   |
|    | 08-23 | 75    | 06-14 | 50    |
|    |       |       | 08-09 | 31.3  |
| 10 | 07-15 | 106.3 | 01-05 | 75    |
|    | 08-25 | 75    | 03-15 | 106.3 |
|    |       |       | 04-25 | 100   |
|    |       |       | 06-18 | 75    |
|    |       |       | 08-13 | 100   |
|    |       |       | 12-22 | 106.3 |
| 11 | 07-16 | 106.3 | 03-15 | 106.3 |
|    | 08-10 | 75    | 05-04 | 100   |
|    |       |       | 06-18 | 50    |
|    |       |       | 08-12 | 31.3  |
|    |       |       | 12-18 | 75    |
| 12 | 04-10 | 43.8  | 03-24 | 75    |
|    | 08-19 | 75    | 04-19 | 100   |
|    |       |       | 06-08 | 75    |
|    |       |       | 08-18 | 31.3  |
|    |       |       | 12-22 | 101.9 |
| 13 | 07-09 | 110.6 | 03-21 | 78.3  |
|    | 07-31 | 119.4 | 06-08 | 125.6 |
|    |       |       | 08-10 | 35.8  |
|    |       |       | 12-18 | 72.8  |
| 14 | 04-09 | 44.4  | 03-15 | 111.8 |
|    | 07-11 | 109.1 | 04-19 | 117   |
|    | 08-21 | 73.1  | 06-10 | 52.4  |
|    |       |       | 07-17 | 81.3  |
|    |       |       | 08-14 | 26.6  |
| 15 | 04-09 | 43.8  | 01-09 | 111.8 |
|    | 07-06 | 106.3 | 03-23 | 108.4 |
|    | 08-17 | 37.5  | 05-04 | 97    |
|    |       |       | 06-18 | 75.6  |
|    |       |       | 08-07 | 116.9 |
|    |       |       | 12-18 | 106.3 |
| 16 | 07-16 | 106.3 | 03-15 | 106.3 |
|    | 08-16 | 75    | 04-29 | 100   |
|    |       |       | 06-15 | 100   |
|    |       |       | 08-14 | 50    |
|    |       |       | 12-22 | 75    |
| 17 | 07-03 | 106.3 | 03-15 | 106.3 |

|    |       |       |       |       |
|----|-------|-------|-------|-------|
|    | 08-14 | 75    | 04-28 | 100   |
|    |       |       | 06-18 | 75    |
|    |       |       | 08-12 | 31.3  |
|    |       |       | 12-22 | 106.3 |
| 18 | 07-03 | 106.3 | 03-23 | 106.3 |
|    | 08-21 | 75    | 04-30 | 100   |
|    |       |       | 06-18 | 50    |
|    |       |       | 08-18 | 31.3  |
|    |       |       | 12-30 | 75    |

---

Table S6 The results of Figure 2 for model validation.

|                                                      | Crop   | Observation  | Simulation | Notes |
|------------------------------------------------------|--------|--------------|------------|-------|
| Yield<br>(Mg DM ha <sup>-1</sup> )                   | Wheat  | 5.4 ± 0.6    | 5.3        |       |
|                                                      |        | 4.3 ± 0.2    | 4.7        |       |
|                                                      |        | 5.5 ± 0.5    | 5.5        |       |
|                                                      |        | 5.3 ± 0.6    | 5.9        |       |
|                                                      |        | 5.9 ± 0.2    | 6.0        |       |
|                                                      |        | 5.4 ± 0.3    | 5.2        |       |
|                                                      |        | 4.3 ± 0.3    | 4.8        |       |
|                                                      |        | 5.5 ± 0.4    | 5.7        |       |
|                                                      |        | 4.9 ± 0.3    | 5.9        |       |
|                                                      |        | 5.7 ± 1.4    | 6.0        |       |
|                                                      |        | 6.3 ± 1.2    | 6.0        |       |
|                                                      |        | 5.6 ± 0.7    | 6.0        |       |
|                                                      |        | 5.7 ± 0.6    | 6.0        |       |
|                                                      |        | 6.0 ± 0.8    | 6.0        |       |
|                                                      |        | 6.8 ± 1.4    | 6.0        |       |
|                                                      | Maize  | 6.1 ± 0.9    | 6.0        |       |
|                                                      |        | 5.1 ± 0.4    | 5.5        |       |
|                                                      |        | 7.8 ± 0.7    | 7.9        |       |
|                                                      |        | 7.5 ± 0.7    | 7.5        |       |
|                                                      |        | 7.1 ± 0.8    | 7.5        |       |
|                                                      |        | 6.7 ± 0.9    | 7.9        |       |
|                                                      |        | 5.8 ± 0.2    | 5.9        |       |
|                                                      |        | 8.4 ± 0.3    | 7.9        |       |
|                                                      |        | 8.2 ± 1.5    | 6.7        |       |
|                                                      |        | 7.1 ± 1.0    | 7.4        |       |
|                                                      |        | 6.7 ± 1.7    | 7.9        |       |
|                                                      |        | 5.8 ± 1.8    | 5.6        |       |
|                                                      |        | 6.7 ± 1.6    | 7.9        |       |
|                                                      |        | 6.9 ± 2.0    | 7.9        |       |
|                                                      |        | 7.6 ± 2.2    | 7.9        |       |
|                                                      |        | 8.2 ± 1.6    | 7.9        |       |
|                                                      |        | 7.1 ± 0.8    | 7.9        |       |
|                                                      | Cotton | 3.4 ± 0.7    | 4.2        |       |
|                                                      |        | 4.4 ± 1.0    | 4.3        |       |
|                                                      |        | 4.2 ± 1.2    | 4.2        |       |
| NEE<br>(Mg C ha <sup>-1</sup> season <sup>-1</sup> ) | Wheat  | -2.56 ± 0.64 | -2.41      |       |
|                                                      |        | -2.38 ± 0.60 | -2.24      |       |
|                                                      | Maize  | -4.70 ± 1.17 | -5.43      |       |
|                                                      | Cotton | -0.40 ± 0.10 | -0.35      |       |
|                                                      |        | -0.85 ± 0.21 | -0.75      |       |

|                                                                        |        |              |       |
|------------------------------------------------------------------------|--------|--------------|-------|
| NEGE<br>(Mg CO <sub>2</sub> eq ha <sup>-1</sup> season <sup>-1</sup> ) | Wheat  | 0.049 ± 2.57 | 1.17  |
|                                                                        |        | 1.51 ± 2.57  | 1.00  |
|                                                                        | Maize  | -4.56 ± 5.40 | -8.44 |
|                                                                        | Cotton | 6.35 ± 1.70  | 6.72  |
| ΔSOC<br>(Mg C ha <sup>-1</sup> season <sup>-1</sup> )                  |        | 4.30 ± 2.10  | 4.66  |
|                                                                        | Wheat  | 0.16 ± 0.70  | -0.16 |
|                                                                        |        | -0.33 ± 0.70 | -0.17 |
|                                                                        | Maize  | 1.59 ± 1.47  | 2.75  |
| CH <sub>4</sub><br>(kg C ha <sup>-1</sup> yr <sup>-1</sup> )           | Cotton | -1.56 ± 0.46 | -1.63 |
|                                                                        |        | -1.05 ± 0.57 | -1.07 |
|                                                                        | W-M    | 1.59 ± 0.08  | 1.50  |
|                                                                        |        | 1.56 ± 0.08  | 1.58  |
| N <sub>2</sub> O<br>(kg N ha <sup>-1</sup> yr <sup>-1</sup> )          |        | 1.51 ± 0.18  | 1.63  |
|                                                                        |        | 1.69 ± 0.20  | 1.67  |
|                                                                        |        | 1.79 ± 0.14  | 1.88  |
|                                                                        | Cotton | 2.33 ± 0.16  | 2.24  |
|                                                                        |        | 1.73 ± 0.16  | 1.71  |
|                                                                        | W-M    | 4.40 ± 1.40  | 3.88  |
|                                                                        |        | 3.50 ± 0.80  | 3.00  |
|                                                                        |        | 4.40 ± 1.40  | 3.88  |
|                                                                        |        | 2.90 ± 0.80  | 3.06  |
|                                                                        |        | 2.69 ± 0.80  | 2.79  |
|                                                                        |        | 2.09 ± 0.40  | 1.84  |
|                                                                        |        | 2.59 ± 0.66  | 3.56  |
|                                                                        |        | 3.51 ± 0.52  | 4.48  |
|                                                                        |        | 5.12 ± 1.56  | 5.77  |
|                                                                        |        | 5.57 ± 1.36  | 6.85  |
|                                                                        | Cotton | 2.56 ± 0.30  | 2.37  |
| NO<br>(kg N ha <sup>-1</sup> yr <sup>-1</sup> )                        |        | 1.57 ± 0.2   | 1.82  |
|                                                                        | W-M    | 2.50 ± 1.00  | 2.41  |
|                                                                        |        | 2.40 ± 0.80  | 2.33  |
|                                                                        |        | 2.20 ± 0.80  | 2.57  |
|                                                                        |        | 0.85 ± 0.40  | 1.13  |
|                                                                        |        | 0.81 ± 0.40  | 1.01  |
|                                                                        |        | 0.91 ± 0.44  | 1.04  |
|                                                                        |        | 1.21 ± 0.28  | 1.20  |
|                                                                        |        | 1.75 ± 0.26  | 2.02  |
|                                                                        |        | 2.23 ± 0.44  | 2.54  |
|                                                                        |        | 2.64 ± 0.98  | 3.21  |
|                                                                        | Cotton | 0.72 ± 0.18  | 0.85  |
| NH <sub>3</sub>                                                        |        | 0.76 ± 0.16  | 0.79  |
|                                                                        | Wheat  | 5.3 ± 0.5    | 5.50  |

For calibration

|                          |        |          |      |
|--------------------------|--------|----------|------|
| (kg N ha <sup>-1</sup> ) |        | 4.3 ±0.4 | 3.92 |
|                          | Cotton | 3.6      | 3.75 |

---

Table S7 The results of Figure 3 for the 18-year simulation of each rotation pattern baseline.

| Cotton yield          | R <sub>0</sub>                    | R <sub>1</sub> | R <sub>2</sub> | R <sub>3</sub> | R <sub>4</sub> | R <sub>5</sub> |
|-----------------------|-----------------------------------|----------------|----------------|----------------|----------------|----------------|
|                       | (Mg dry matter ha <sup>-1</sup> ) |                |                |                |                |                |
| 1 <sup>st</sup> year  | —                                 | 3.9            | 3.9            | 3.9            | 3.9            | 3.9            |
| 2 <sup>nd</sup> year  | —                                 | —              | 6.5            | 6.5            | 6.5            | 6.5            |
| 3 <sup>rd</sup> year  | —                                 | —              | —              | 10.5           | 10.6           | 10.6           |
| 4 <sup>th</sup> year  | —                                 | —              | —              | —              | 14.2           | 14.2           |
| 5 <sup>th</sup> year  | —                                 | —              | —              | —              | —              | 17.4           |
| 6 <sup>th</sup> year  | —                                 | —              | —              | —              | —              | —              |
| 7 <sup>th</sup> year  | —                                 | 7.4            | 10.0           | 14.0           | 17.7           | 20.8           |
| 8 <sup>th</sup> year  | —                                 | —              | 13.4           | 17.4           | 21.1           | 24.2           |
| 9 <sup>th</sup> year  | —                                 | —              | —              | 21.1           | 24.7           | 27.9           |
| 10 <sup>th</sup> year | —                                 | —              | —              | —              | 27.9           | 31.1           |
| 11 <sup>th</sup> year | —                                 | —              | —              | —              | —              | 34.7           |
| 12 <sup>th</sup> year | —                                 | —              | —              | —              | —              | —              |
| 13 <sup>th</sup> year | —                                 | 10.8           | 16.9           | 24.5           | 31.4           | 38.1           |
| 14 <sup>th</sup> year | —                                 | —              | 20.7           | 28.3           | 35.2           | 42.0           |
| 15 <sup>th</sup> year | —                                 | —              | —              | 31.8           | 38.7           | 45.4           |
| 16 <sup>th</sup> year | —                                 | —              | —              | —              | 41.7           | 48.5           |
| 17 <sup>th</sup> year | —                                 | —              | —              | —              | —              | 51.5           |
| 18 <sup>th</sup> year | —                                 | —              | —              | —              | —              | —              |

  

| Wheat yield           | R <sub>0</sub>                    | R <sub>1</sub> | R <sub>2</sub> | R <sub>3</sub> | R <sub>4</sub> | R <sub>5</sub> |
|-----------------------|-----------------------------------|----------------|----------------|----------------|----------------|----------------|
|                       | (Mg dry matter ha <sup>-1</sup> ) |                |                |                |                |                |
| 1 <sup>st</sup> year  | 3.1                               | —              | —              | —              | —              | —              |
| 2 <sup>nd</sup> year  | 6.7                               | 4.0            | —              | —              | —              | —              |
| 3 <sup>rd</sup> year  | 11.5                              | 8.7            | 4.7            | —              | —              | —              |
| 4 <sup>th</sup> year  | 16.7                              | 14.0           | 9.9            | 5.2            | —              | —              |
| 5 <sup>th</sup> year  | 21.5                              | 18.7           | 14.7           | 9.9            | 4.7            | —              |
| 6 <sup>th</sup> year  | 26.4                              | 23.6           | 19.6           | 14.8           | 9.6            | 4.9            |
| 7 <sup>th</sup> year  | 31.4                              | —              | —              | —              | —              | —              |
| 8 <sup>th</sup> year  | 36.7                              | 28.9           | —              | —              | —              | —              |
| 9 <sup>th</sup> year  | 42.0                              | 34.1           | 24.8           | —              | —              | —              |
| 10 <sup>th</sup> year | 47.4                              | 39.4           | 30.2           | 20.1           | —              | —              |
| 11 <sup>th</sup> year | 52.4                              | 44.5           | 35.2           | 25.2           | 14.7           | —              |
| 12 <sup>th</sup> year | 57.6                              | 49.7           | 40.4           | 30.4           | 19.8           | 10.0           |
| 13 <sup>th</sup> year | 62.4                              | —              | —              | —              | —              | —              |
| 14 <sup>th</sup> year | 67.4                              | 54.6           | —              | —              | —              | —              |
| 15 <sup>th</sup> year | 71.3                              | 58.5           | 44.3           | —              | —              | —              |
| 16 <sup>th</sup> year | 75.3                              | 62.4           | 48.1           | 34.6           | —              | —              |

|                       |      |      |      |      |      |      |
|-----------------------|------|------|------|------|------|------|
| 17 <sup>th</sup> year | 80.1 | 66.8 | 52.4 | 38.9 | 24.6 | —    |
| 18 <sup>th</sup> year | 85.0 | 71.6 | 57.2 | 43.6 | 29.4 | 14.8 |

| Maize yield           | R <sub>0</sub>                    | R <sub>1</sub> | R <sub>2</sub> | R <sub>3</sub> | R <sub>4</sub> | R <sub>5</sub> |
|-----------------------|-----------------------------------|----------------|----------------|----------------|----------------|----------------|
|                       | (Mg dry matter ha <sup>-1</sup> ) |                |                |                |                |                |
| 1 <sup>st</sup> year  | 6.7                               | —              | —              | —              | —              | —              |
| 2 <sup>nd</sup> year  | 12.2                              | 5.3            | —              | —              | —              | —              |
| 3 <sup>rd</sup> year  | 19.0                              | 12.0           | 6.7            | —              | —              | —              |
| 4 <sup>th</sup> year  | 25.6                              | 18.7           | 13.3           | 6.6            | —              | —              |
| 5 <sup>th</sup> year  | 32.6                              | 25.6           | 20.3           | 13.6           | 6.9            | —              |
| 6 <sup>th</sup> year  | 39.3                              | 31.9           | 27.0           | 20.2           | 13.6           | 6.6            |
| 7 <sup>th</sup> year  | 45.3                              | —              | —              | —              | —              | —              |
| 8 <sup>th</sup> year  | 51.3                              | 37.9           | —              | —              | —              | —              |
| 9 <sup>th</sup> year  | 57.9                              | 44.3           | 33.3           | —              | —              | —              |
| 10 <sup>th</sup> year | 64.3                              | 50.7           | 39.7           | 26.6           | —              | —              |
| 11 <sup>th</sup> year | 70.9                              | 57.3           | 46.2           | 33.1           | 20.0           | —              |
| 12 <sup>th</sup> year | 78.3                              | 64.7           | 53.7           | 40.5           | 27.4           | 13.9           |
| 13 <sup>th</sup> year | 84.5                              | —              | —              | —              | —              | —              |
| 14 <sup>th</sup> year | 90.8                              | 70.9           | —              | —              | —              | —              |
| 15 <sup>th</sup> year | 97.9                              | 78.0           | 60.7           | —              | —              | —              |
| 16 <sup>th</sup> year | 104.7                             | 84.8           | 67.5           | 47.3           | —              | —              |
| 17 <sup>th</sup> year | 111.5                             | 91.6           | 74.3           | 54.0           | 34.1           | —              |
| 18 <sup>th</sup> year | 118.6                             | 98.6           | 81.3           | 61.0           | 41.0           | 20.8           |

| ΔSOC                  | R <sub>0</sub>           | R <sub>1</sub> | R <sub>2</sub> | R <sub>3</sub> | R <sub>4</sub> | R <sub>5</sub> |
|-----------------------|--------------------------|----------------|----------------|----------------|----------------|----------------|
|                       | (Mg C ha <sup>-1</sup> ) |                |                |                |                |                |
| 1 <sup>st</sup> year  | 0.96                     | -0.27          | 0.56           | 0.82           | 0.88           | 0.75           |
| 2 <sup>nd</sup> year  | 1.64                     | -0.27          | -1.42          | -0.49          | -0.09          | 0.13           |
| 3 <sup>rd</sup> year  | 2.42                     | 0.40           | -0.94          | -1.11          | -0.38          | -0.04          |
| 4 <sup>th</sup> year  | 3.22                     | 1.25           | 0.01           | -0.61          | -0.89          | -0.22          |
| 5 <sup>th</sup> year  | 3.86                     | 2.11           | 1.00           | 0.30           | -0.41          | -0.74          |
| 6 <sup>th</sup> year  | 4.47                     | 2.70           | 1.66           | 0.96           | 0.32           | -0.43          |
| 7 <sup>th</sup> year  | 5.05                     | 1.74           | 1.84           | 1.46           | 0.85           | 0.08           |
| 8 <sup>th</sup> year  | 5.62                     | 1.83           | 0.24           | 0.46           | 0.15           | -0.30          |
| 9 <sup>th</sup> year  | 6.29                     | 2.52           | 0.65           | -0.34          | -0.22          | -0.51          |
| 10 <sup>th</sup> year | 6.90                     | 3.34           | 1.52           | 0.14           | -0.80          | -0.76          |
| 11 <sup>th</sup> year | 7.47                     | 4.15           | 2.44           | 1.03           | -0.31          | -1.18          |
| 12 <sup>th</sup> year | 7.95                     | 4.68           | 3.10           | 1.72           | 0.33           | -0.89          |
| 13 <sup>th</sup> year | 8.56                     | 3.87           | 3.29           | 2.25           | 0.99           | -0.30          |
| 14 <sup>th</sup> year | 9.15                     | 3.97           | 1.70           | 1.29           | 0.34           | -0.64          |
| 15 <sup>th</sup> year | 9.79                     | 4.68           | 2.13           | 0.44           | -0.12          | -0.93          |
| 16 <sup>th</sup> year | 10.54                    | 5.59           | 3.08           | 1.01           | -0.74          | -1.18          |

|                       |       |      |      |      |       |       |
|-----------------------|-------|------|------|------|-------|-------|
| 17 <sup>th</sup> year | 11.05 | 6.33 | 3.90 | 1.79 | −0.31 | −1.63 |
| 18 <sup>th</sup> year | 11.42 | 7.01 | 4.66 | 2.56 | 0.40  | −1.30 |

| CH <sub>4</sub>       | R <sub>0</sub>           | R <sub>1</sub> | R <sub>2</sub> | R <sub>3</sub> | R <sub>4</sub> | R <sub>5</sub> |
|-----------------------|--------------------------|----------------|----------------|----------------|----------------|----------------|
|                       | (kg C ha <sup>−1</sup> ) |                |                |                |                |                |
| 1 <sup>st</sup> year  | −1.6                     | −1.6           | −1.6           | −1.6           | −1.6           | −1.6           |
| 2 <sup>nd</sup> year  | −3.6                     | −3.7           | −3.7           | −3.7           | −3.7           | −3.7           |
| 3 <sup>rd</sup> year  | −5.4                     | −5.5           | −5.5           | −5.6           | −5.6           | −5.6           |
| 4 <sup>th</sup> year  | −7.4                     | −7.5           | −7.5           | −7.6           | −7.6           | −7.6           |
| 5 <sup>th</sup> year  | −9.1                     | −9.3           | −9.3           | −9.4           | −9.4           | −9.5           |
| 6 <sup>th</sup> year  | −11.0                    | −11.1          | −11.2          | −11.3          | −11.3          | −11.4          |
| 7 <sup>th</sup> year  | −12.9                    | −13.1          | −13.2          | −13.3          | −13.3          | −13.4          |
| 8 <sup>th</sup> year  | −14.9                    | −15.1          | −15.2          | −15.3          | −15.3          | −15.4          |
| 9 <sup>th</sup> year  | −16.6                    | −16.9          | −17.0          | −17.2          | −17.1          | −17.2          |
| 10 <sup>th</sup> year | −18.4                    | −18.7          | −18.8          | −19.0          | −19.0          | −19.1          |
| 11 <sup>th</sup> year | −20.3                    | −20.6          | −20.7          | −20.9          | −20.9          | −21.0          |
| 12 <sup>th</sup> year | −22.0                    | −22.4          | −22.5          | −22.7          | −22.7          | −22.8          |
| 13 <sup>th</sup> year | −23.8                    | −24.2          | −24.3          | −24.5          | −24.6          | −24.7          |
| 14 <sup>th</sup> year | −25.6                    | −26.0          | −26.1          | −26.3          | −26.4          | −26.5          |
| 15 <sup>th</sup> year | −27.3                    | −27.7          | −27.9          | −28.1          | −28.2          | −28.3          |
| 16 <sup>th</sup> year | −29.1                    | −29.5          | −29.7          | −30.0          | −30.1          | −30.2          |
| 17 <sup>th</sup> year | −30.9                    | −31.3          | −31.5          | −31.8          | −32.0          | −32.1          |
| 18 <sup>th</sup> year | −32.9                    | −33.3          | −33.5          | −33.8          | −34.0          | −34.2          |

| N <sub>2</sub> O      | R <sub>0</sub>           | R <sub>1</sub> | R <sub>2</sub> | R <sub>3</sub> | R <sub>4</sub> | R <sub>5</sub> |
|-----------------------|--------------------------|----------------|----------------|----------------|----------------|----------------|
|                       | (kg N ha <sup>−1</sup> ) |                |                |                |                |                |
| 1 <sup>st</sup> year  | 3.9                      | 6.5            | 7.0            | 5.6            | 4.9            | 4.2            |
| 2 <sup>nd</sup> year  | 6.7                      | 8.6            | 10.4           | 10.3           | 8.9            | 6.6            |
| 3 <sup>rd</sup> year  | 10.6                     | 11.8           | 13.4           | 11.2           | 11.3           | 8.8            |
| 4 <sup>th</sup> year  | 14.2                     | 15.4           | 16.9           | 14.5           | 12.9           | 11.6           |
| 5 <sup>th</sup> year  | 21.0                     | 20.4           | 21.0           | 17.9           | 15.9           | 13.2           |
| 6 <sup>th</sup> year  | 25.2                     | 24.8           | 25.0           | 21.6           | 19.3           | 16.3           |
| 7 <sup>th</sup> year  | 32.0                     | 30.6           | 31.3           | 29.2           | 24.9           | 20.6           |
| 8 <sup>th</sup> year  | 37.4                     | 32.3           | 33.8           | 32.8           | 28.1           | 23.4           |
| 9 <sup>th</sup> year  | 42.2                     | 36.1           | 37.2           | 33.7           | 30.1           | 25.3           |
| 10 <sup>th</sup> year | 47.1                     | 40.5           | 40.8           | 36.6           | 31.5           | 27.5           |
| 11 <sup>th</sup> year | 50.5                     | 43.9           | 43.9           | 39.3           | 33.9           | 28.7           |
| 12 <sup>th</sup> year | 56.5                     | 49.6           | 48.5           | 43.1           | 37.1           | 31.8           |
| 13 <sup>th</sup> year | 60.0                     | 55.2           | 54.1           | 47.9           | 41.0           | 35.6           |
| 14 <sup>th</sup> year | 66.0                     | 58.4           | 57.5           | 53.1           | 45.5           | 38.1           |
| 15 <sup>th</sup> year | 69.6                     | 61.6           | 60.4           | 54.1           | 47.7           | 40.1           |
| 16 <sup>th</sup> year | 74.6                     | 66.1           | 64.4           | 57.8           | 49.5           | 42.7           |

|                       |      |      |      |      |      |      |
|-----------------------|------|------|------|------|------|------|
| 17 <sup>th</sup> year | 78.8 | 70.2 | 68.2 | 61.2 | 52.8 | 43.9 |
| 18 <sup>th</sup> year | 83.3 | 73.6 | 71.2 | 63.9 | 55.0 | 47.0 |

| NEGE                  | R <sub>0</sub>                         | R <sub>1</sub> | R <sub>2</sub> | R <sub>3</sub> | R <sub>4</sub> | R <sub>5</sub> |
|-----------------------|----------------------------------------|----------------|----------------|----------------|----------------|----------------|
|                       | (Mg CO <sub>2</sub> ha <sup>-1</sup> ) |                |                |                |                |                |
| 1 <sup>st</sup> year  | -1.78                                  | 3.93           | 1.16           | -0.46          | -1.01          | -0.88          |
| 2 <sup>nd</sup> year  | -3.06                                  | 4.81           | 9.89           | 6.44           | 4.30           | 2.41           |
| 3 <sup>rd</sup> year  | -4.15                                  | 3.82           | 9.49           | 9.05           | 6.40           | 3.95           |
| 4 <sup>th</sup> year  | -5.48                                  | 2.29           | 7.52           | 8.68           | 8.93           | 5.81           |
| 5 <sup>th</sup> year  | -4.71                                  | 1.42           | 5.70           | 6.84           | 8.47           | 8.38           |
| 6 <sup>th</sup> year  | -5.09                                  | 1.21           | 5.10           | 6.05           | 7.30           | 8.63           |
| 7 <sup>th</sup> year  | -4.12                                  | 7.38           | 7.31           | 7.71           | 7.94           | 8.69           |
| 8 <sup>th</sup> year  | -3.78                                  | 7.74           | 14.26          | 12.96          | 11.89          | 11.32          |
| 9 <sup>th</sup> year  | -4.06                                  | 6.90           | 14.26          | 16.23          | 14.13          | 12.89          |
| 10 <sup>th</sup> year | -4.05                                  | 5.88           | 12.66          | 15.76          | 16.79          | 14.76          |
| 11 <sup>th</sup> year | -4.65                                  | 4.39           | 10.68          | 13.70          | 16.05          | 16.77          |
| 12 <sup>th</sup> year | -3.69                                  | 5.03           | 10.31          | 12.85          | 15.13          | 17.06          |
| 13 <sup>th</sup> year | -4.40                                  | 10.57          | 12.14          | 13.06          | 14.45          | 16.61          |
| 14 <sup>th</sup> year | -3.81                                  | 11.60          | 19.50          | 18.92          | 18.82          | 18.92          |
| 15 <sup>th</sup> year | -4.55                                  | 10.41          | 19.21          | 22.45          | 21.44          | 20.86          |
| 16 <sup>th</sup> year | -5.03                                  | 9.09           | 17.54          | 21.99          | 24.52          | 22.93          |
| 17 <sup>th</sup> year | -5.03                                  | 8.24           | 16.22          | 20.69          | 24.41          | 25.04          |
| 18 <sup>th</sup> year | -4.38                                  | 7.27           | 14.73          | 19.01          | 22.75          | 25.19          |

| NO                    | R <sub>0</sub>           | R <sub>1</sub> | R <sub>2</sub> | R <sub>3</sub> | R <sub>4</sub> | R <sub>5</sub> |
|-----------------------|--------------------------|----------------|----------------|----------------|----------------|----------------|
|                       | (kg N ha <sup>-1</sup> ) |                |                |                |                |                |
| 1 <sup>st</sup> year  | 2.8                      | 2.6            | 1.9            | 1.5            | 1.3            | 1.2            |
| 2 <sup>nd</sup> year  | 4.3                      | 4.0            | 2.9            | 2.5            | 2.1            | 1.7            |
| 3 <sup>rd</sup> year  | 7.0                      | 6.6            | 5.5            | 3.2            | 2.7            | 2.3            |
| 4 <sup>th</sup> year  | 9.5                      | 8.9            | 7.7            | 5.3            | 3.7            | 3.1            |
| 5 <sup>th</sup> year  | 12.7                     | 11.5           | 10.2           | 7.6            | 5.9            | 4.0            |
| 6 <sup>th</sup> year  | 15.2                     | 13.8           | 12.4           | 9.7            | 8.0            | 6.0            |
| 7 <sup>th</sup> year  | 17.1                     | 16.6           | 14.8           | 11.6           | 9.5            | 7.1            |
| 8 <sup>th</sup> year  | 18.7                     | 17.5           | 16.0           | 12.6           | 10.4           | 8.0            |
| 9 <sup>th</sup> year  | 21.6                     | 20.0           | 18.4           | 13.4           | 11.0           | 8.6            |
| 10 <sup>th</sup> year | 23.7                     | 21.9           | 20.1           | 15.0           | 11.9           | 9.3            |
| 11 <sup>th</sup> year | 25.8                     | 23.8           | 21.9           | 16.7           | 13.4           | 10.1           |
| 12 <sup>th</sup> year | 28.9                     | 26.7           | 24.6           | 19.2           | 15.9           | 12.6           |
| 13 <sup>th</sup> year | 31.5                     | 28.8           | 26.1           | 20.4           | 16.9           | 13.6           |
| 14 <sup>th</sup> year | 34.8                     | 31.4           | 27.4           | 21.5           | 17.8           | 14.2           |
| 15 <sup>th</sup> year | 37.4                     | 33.6           | 29.6           | 22.3           | 18.4           | 14.8           |
| 16 <sup>th</sup> year | 40.1                     | 36.1           | 32.0           | 24.6           | 19.3           | 15.5           |

|                       |      |      |      |      |      |      |
|-----------------------|------|------|------|------|------|------|
| 17 <sup>th</sup> year | 42.5 | 38.3 | 34.2 | 26.7 | 21.5 | 16.1 |
| 18 <sup>th</sup> year | 45.9 | 40.9 | 36.5 | 28.9 | 23.5 | 18.8 |

| NH <sub>3</sub>       | R <sub>0</sub>           | R <sub>1</sub> | R <sub>2</sub> | R <sub>3</sub> | R <sub>4</sub> | R <sub>5</sub> |
|-----------------------|--------------------------|----------------|----------------|----------------|----------------|----------------|
|                       | (kg N ha <sup>-1</sup> ) |                |                |                |                |                |
| 1 <sup>st</sup> year  | 48                       | 26             | 20             | 18             | 17             | 17             |
| 2 <sup>nd</sup> year  | 134                      | 97             | 72             | 51             | 48             | 46             |
| 3 <sup>rd</sup> year  | 204                      | 171            | 153            | 95             | 66             | 63             |
| 4 <sup>th</sup> year  | 289                      | 260            | 246            | 199            | 94             | 83             |
| 5 <sup>th</sup> year  | 363                      | 335            | 322            | 277            | 182            | 108            |
| 6 <sup>th</sup> year  | 449                      | 418            | 406            | 365            | 278            | 183            |
| 7 <sup>th</sup> year  | 534                      | 472            | 436            | 394            | 306            | 209            |
| 8 <sup>th</sup> year  | 617                      | 544            | 485            | 423            | 334            | 236            |
| 9 <sup>th</sup> year  | 688                      | 618            | 571            | 451            | 352            | 253            |
| 10 <sup>th</sup> year | 766                      | 702            | 660            | 553            | 383            | 273            |
| 11 <sup>th</sup> year | 844                      | 783            | 744            | 641            | 481            | 314            |
| 12 <sup>th</sup> year | 906                      | 835            | 797            | 696            | 539            | 382            |
| 13 <sup>th</sup> year | 981                      | 878            | 821            | 719            | 561            | 403            |
| 14 <sup>th</sup> year | 1040                     | 949            | 859            | 747            | 588            | 429            |
| 15 <sup>th</sup> year | 1102                     | 1015           | 941            | 787            | 613            | 454            |
| 16 <sup>th</sup> year | 1197                     | 1086           | 1016           | 873            | 644            | 479            |
| 17 <sup>th</sup> year | 1277                     | 1176           | 1109           | 970            | 720            | 503            |
| 18 <sup>th</sup> year | 1336                     | 1240           | 1173           | 1034           | 787            | 584            |

| NO <sub>3</sub> <sup>-</sup> | R <sub>0</sub>           | R <sub>1</sub> | R <sub>2</sub> | R <sub>3</sub> | R <sub>4</sub> | R <sub>5</sub> |
|------------------------------|--------------------------|----------------|----------------|----------------|----------------|----------------|
|                              | (kg N ha <sup>-1</sup> ) |                |                |                |                |                |
| 1 <sup>st</sup> year         | 166                      | 133            | 53             | 47             | 45             | 64             |
| 2 <sup>nd</sup> year         | 176                      | 143            | 119            | 95             | 86             | 107            |
| 3 <sup>rd</sup> year         | 311                      | 203            | 241            | 204            | 153            | 171            |
| 4 <sup>th</sup> year         | 367                      | 247            | 295            | 261            | 241            | 230            |
| 5 <sup>th</sup> year         | 500                      | 350            | 387            | 304            | 378            | 335            |
| 6 <sup>th</sup> year         | 537                      | 376            | 409            | 327            | 424            | 366            |
| 7 <sup>th</sup> year         | 600                      | 498            | 448            | 360            | 463            | 397            |
| 8 <sup>th</sup> year         | 672                      | 580            | 533            | 425            | 526            | 446            |
| 9 <sup>th</sup> year         | 743                      | 659            | 631            | 510            | 599            | 504            |
| 10 <sup>th</sup> year        | 871                      | 768            | 746            | 628            | 737            | 578            |
| 11 <sup>th</sup> year        | 897                      | 787            | 763            | 647            | 765            | 649            |
| 12 <sup>th</sup> year        | 1116                     | 849            | 817            | 697            | 820            | 751            |
| 13 <sup>th</sup> year        | 1140                     | 919            | 860            | 735            | 855            | 800            |
| 14 <sup>th</sup> year        | 1258                     | 1049           | 978            | 824            | 929            | 874            |
| 15 <sup>th</sup> year        | 1378                     | 1197           | 1127           | 955            | 1013           | 952            |
| 16 <sup>th</sup> year        | 1522                     | 1313           | 1178           | 1013           | 1172           | 1068           |

|                       |      |      |      |      |      |      |
|-----------------------|------|------|------|------|------|------|
| 17 <sup>th</sup> year | 1543 | 1329 | 1193 | 1026 | 1189 | 1104 |
| 18 <sup>th</sup> year | 1571 | 1349 | 1210 | 1042 | 1203 | 1135 |

---

Table S8 The results of Figure 4.

|                                                                    |                      | R <sub>0</sub> | R <sub>1</sub> | R <sub>2</sub> | R <sub>3</sub> | R <sub>4</sub> | R <sub>5</sub> |
|--------------------------------------------------------------------|----------------------|----------------|----------------|----------------|----------------|----------------|----------------|
| -ΔSOC<br>(Mg C ha <sup>-1</sup> yr <sup>-1</sup> )                 | Sim                  | -0.63          | -0.39          | -0.26          | -0.14          | -0.02          | 0.07           |
|                                                                    | ε <sub>input</sub>   | 0.010          | 0.014          | 0.016          | 0.018          | 0.013          | 0.079          |
|                                                                    | ε <sub>s</sub>       | 0.15           | 0.09           | 0.06           | 0.03           | -0.02          | -0.02          |
|                                                                    | SD of ε <sub>s</sub> | 0.09           | 0.06           | 0.04           | 0.02           | 0.01           | 0.01           |
| CH <sub>4</sub><br>(kg C ha <sup>-1</sup> yr <sup>-1</sup> )       | Sim                  | -1.83          | -1.85          | -1.86          | -1.88          | -1.89          | -1.90          |
|                                                                    | ε <sub>input</sub>   | 0.005          | 0.005          | 0.005          | 0.005          | 0.005          | 0.005          |
|                                                                    | ε <sub>s</sub>       | 0.003          | 0.004          | 0.004          | 0.004          | 0.004          | 0.004          |
|                                                                    | SD of ε <sub>s</sub> | 0.031          | 0.032          | 0.032          | 0.032          | 0.032          | 0.032          |
| N <sub>2</sub> O<br>(kg N ha <sup>-1</sup> yr <sup>-1</sup> )      | Sim                  | 4.63           | 4.09           | 2.95           | 3.55           | 3.06           | 2.61           |
|                                                                    | ε <sub>input</sub>   | 0.66           | 0.46           | 0.45           | 0.37           | 0.28           | 0.24           |
|                                                                    | ε <sub>s</sub>       | 0.37           | 0.33           | 0.32           | 0.28           | 0.24           | 0.21           |
|                                                                    | SD of ε <sub>s</sub> | 0.19           | 0.17           | 0.16           | 0.15           | 0.13           | 0.11           |
| NEGE<br>(Mg CO <sub>2</sub> eq ha <sup>-1</sup> yr <sup>-1</sup> ) | Sim                  | -0.24          | 0.40           | 0.82           | 1.06           | 1.26           | 1.40           |
|                                                                    | ε <sub>input</sub>   | 0.31           | 0.23           | 0.21           | 0.18           | 0.14           | 0.13           |
|                                                                    | ε <sub>s</sub>       | -0.05          | 0.08           | 0.17           | 0.22           | 0.33           | 0.29           |
|                                                                    | SD of ε <sub>s</sub> | 0.04           | 0.06           | 0.12           | 0.15           | 0.24           | 0.20           |
| NH <sub>3</sub><br>(kg N ha <sup>-1</sup> yr <sup>-1</sup> )       | Sim                  | 74             | 69             | 65             | 57             | 44             | 32             |
|                                                                    | ε <sub>input</sub>   | 5.5            | 5.9            | 5.4            | 4.3            | 4.2            | 3.8            |
|                                                                    | ε <sub>s</sub>       | -0.30          | -0.29          | -0.26          | -0.23          | -0.18          | -0.13          |
|                                                                    | SD of ε <sub>s</sub> | 5.5            | 5.1            | 4.8            | 4.2            | 3.2            | 2.4            |
| NO<br>(kg N ha <sup>-1</sup> yr <sup>-1</sup> )                    | Sim                  | 2.55           | 2.27           | 2.03           | 1.60           | 1.31           | 1.04           |
|                                                                    | ε <sub>input</sub>   | 0.06           | 0.05           | 0.04           | 0.04           | 0.04           | 0.03           |
|                                                                    | ε <sub>s</sub>       | 0.23           | 0.21           | 0.19           | 0.15           | 0.12           | 0.10           |
|                                                                    | SD of ε <sub>s</sub> | 0.07           | 0.07           | 0.06           | 0.05           | 0.04           | 0.03           |
| NL<br>(kg N ha <sup>-1</sup> yr <sup>-1</sup> )                    | Sim                  | 87             | 75             | 67             | 58             | 69             | 63             |
|                                                                    | ε <sub>input</sub>   | 4.9            | 5.5            | 5.1            | 3.4            | 5.0            | 4.8            |
|                                                                    | ε <sub>s</sub>       | -36            | -31            | -28            | -24            | -28            | -26            |
|                                                                    | SD of ε <sub>s</sub> | 4.3            | 3.7            | 3.3            | 2.9            | 3.3            | 3.1            |
| NIP<br>(US\$ ha <sup>-1</sup> yr <sup>-1</sup> )                   | Sim                  | 610            | 556            | 519            | 453            | 395            | 324            |
|                                                                    | ε <sub>input</sub>   | 16             | 15             | 14             | 14             | 10             | 9              |
|                                                                    | ε <sub>s</sub>       | -66            | -63            | -59            | -41            | -58            | -55            |
|                                                                    | SD of ε <sub>s</sub> | 29             | 26             | 24             | 22             | 17             | 13             |
